# Supplementary material
Source: Research Square preprint supplement (doi:10.21203/rs.3.rs-10072722/v1)
Supplement: Supplementary file 1 [file 06aafbf42c04e6ead7b2389a.xlsx]

## Sheet: Table S1 - Cohorts
Table S1. Cohort assignments for 943 lines (926 breeding + 17 checks). Each line assigned to one era based on first nursery entry year.
sample_id	entry_year	Era	is_check	check_type
2375	1995	1992-1999	TRUE	susceptible
12/14/1981	2013	2008-2015	FALSE	breeding
12/14/1997	2013	2008-2015	FALSE	breeding
00EPWB-27	2001	2000-2007	FALSE	breeding
00H04J3	2005	2000-2007	FALSE	breeding
03CBWA3-15	2004	2000-2007	FALSE	breeding
03CBWC-21	2004	2000-2007	FALSE	breeding
10EXP13-16	2011	2008-2015	FALSE	breeding
10EXP13-24	2011	2008-2015	FALSE	breeding
10EXP13-44	2011	2008-2015	FALSE	breeding
10EXP13-87	2011	2008-2015	FALSE	breeding
10EXPSW13-19	2011	2008-2015	FALSE	breeding
10EXPSW13-28	2011	2008-2015	FALSE	breeding
10EXPSW13-9	2011	2008-2015	FALSE	breeding
11EXP13-105	2012	2008-2015	FALSE	breeding
11EXP13-107	2012	2008-2015	FALSE	breeding
11EXP13-43	2012	2008-2015	FALSE	breeding
11EXP13-65	2012	2008-2015	FALSE	breeding
11EXP13-78	2012	2008-2015	FALSE	breeding
12-14-147	2013	2008-2015	FALSE	breeding
12-14-158	2013	2008-2015	FALSE	breeding
12-14-172	2013	2008-2015	FALSE	breeding
14-13-106	2015	2008-2015	FALSE	breeding
14-13-135	2015	2008-2015	FALSE	breeding
14-13-14	2015	2008-2015	FALSE	breeding
14-13-21	2015	2008-2015	FALSE	breeding
14-13-97	2015	2008-2015	FALSE	breeding
14X111-106-3	2020	2016-2024	FALSE	breeding
9229G-003B	2001	2000-2007	FALSE	breeding
93B42-AW3C	1999	1992-1999	FALSE	breeding
93B42-V2A	1998	1992-1999	FALSE	breeding
93B43-AH1A	1998	1992-1999	FALSE	breeding
93FBB21	1998	1992-1999	FALSE	breeding
93FHB_12	1996	1992-1999	FALSE	breeding
93FHB_21	1995	1992-1999	FALSE	breeding
93FHB_37	1995	1992-1999	FALSE	breeding
94B15-D9D5	2000	2000-2007	FALSE	breeding
94B16-S14A5	2000	2000-2007	FALSE	breeding
94FHB_28	1995	1992-1999	FALSE	breeding
94FHB_34	1996	1992-1999	FALSE	breeding
94FHB_55	1996	1992-1999	FALSE	breeding
94FHB_9	1995	1992-1999	FALSE	breeding
96B32-AN3C	2003	2000-2007	FALSE	breeding
96KEY30	1997	1992-1999	FALSE	breeding
96KEY31	1997	1992-1999	FALSE	breeding
96KEY37	1997	1992-1999	FALSE	breeding
96KEY9	1997	1992-1999	FALSE	breeding
97EPWB12	1998	1992-1999	FALSE	breeding
97EPWB16	1998	1992-1999	FALSE	breeding
98B08A59	2002	2000-2007	FALSE	breeding
98B08B111	2002	2000-2007	FALSE	breeding
98B19N22	2002	2000-2007	FALSE	breeding
98B19S87	2002	2000-2007	FALSE	breeding
98B19T99	2002	2000-2007	FALSE	breeding
98EPWBFHB43	1999	1992-1999	FALSE	breeding
AAC_HODGE	2024	2016-2024	FALSE	breeding
AAC_SPIKE	2024	2016-2024	FALSE	breeding
AAC_WESTKING	2024	2016-2024	FALSE	breeding
AACBRANDON	2020	2016-2024	FALSE	breeding
ACBARRIE	1992	1992-1999	FALSE	breeding
ACCORA	1992	1992-1999	FALSE	breeding
ACDOMIAN	1995	1992-1999	FALSE	breeding
AC-MAJESTIC	1996	1992-1999	FALSE	breeding
ADA	1999	1992-1999	FALSE	breeding
ADVANCE	2010	2008-2015	FALSE	breeding
ALSEN	1999	1992-1999	TRUE	resistant
ASCEND-SD	2020	2016-2024	FALSE	breeding
ATA81	1996	1992-1999	FALSE	breeding
B91-0228	1997	1992-1999	FALSE	breeding
BA04-CH-1	2007	2000-2007	FALSE	breeding
BA07-DE-19	2007	2000-2007	FALSE	breeding
BACUP	1995	1992-1999	TRUE	resistant
BB34-CK-1-B-17	2009	2008-2015	FALSE	breeding
BD76AJ0199	2009	2008-2015	FALSE	breeding
BD94BD0248	2009	2008-2015	FALSE	breeding
BOOST	2013	2008-2015	TRUE	resistant
BRAWN-SD	2021	2016-2024	FALSE	breeding
BRICK	2005	2000-2007	TRUE	resistant
BRIGGS	1998	1992-1999	FALSE	breeding
BUTTE86	1992	1992-1999	FALSE	breeding
BW1025	2016	2016-2024	FALSE	breeding
BW1027	2016	2016-2024	FALSE	breeding
BW1045	2017	2016-2024	FALSE	breeding
BW1046	2017	2016-2024	FALSE	breeding
BW1048	2017	2016-2024	FALSE	breeding
BW1049	2016	2016-2024	FALSE	breeding
BW1053	2018	2016-2024	FALSE	breeding
BW1054	2018	2016-2024	FALSE	breeding
BW1067	2018	2016-2024	FALSE	breeding
BW1069	2018	2016-2024	FALSE	breeding
BW1094	2021	2016-2024	FALSE	breeding
BW156	1992	1992-1999	FALSE	breeding
BW173	1994	1992-1999	FALSE	breeding
BW174	1994	1992-1999	FALSE	breeding
BW191	1995	1992-1999	FALSE	breeding
BW252	1999	1992-1999	FALSE	breeding
BW259	2000	2000-2007	FALSE	breeding
BW270	2000	2000-2007	FALSE	breeding
BW306	2002	2000-2007	FALSE	breeding
BW307	2003	2000-2007	FALSE	breeding
BW308	2001	2000-2007	FALSE	breeding
BW310	2001	2000-2007	FALSE	breeding
BW311	2001	2000-2007	FALSE	breeding
BW312	2001	2000-2007	FALSE	breeding
BW313	2002	2000-2007	FALSE	breeding
BW314A	2003	2000-2007	FALSE	breeding
BW341	2004	2000-2007	FALSE	breeding
BW342	2006	2000-2007	FALSE	breeding
BW346	2004	2000-2007	FALSE	breeding
BW361	2005	2000-2007	FALSE	breeding
BW362	2007	2000-2007	FALSE	breeding
BW364	2005	2000-2007	FALSE	breeding
BW365	2008	2008-2015	FALSE	breeding
BW367	2005	2000-2007	FALSE	breeding
BW379	2006	2000-2007	FALSE	breeding
BW396	2008	2008-2015	FALSE	breeding
BW415	2008	2008-2015	FALSE	breeding
BW427	2010	2008-2015	FALSE	breeding
BW429	2011	2008-2015	FALSE	breeding
BW430	2008	2008-2015	FALSE	breeding
BW431	2010	2008-2015	FALSE	breeding
BW464	2012	2008-2015	FALSE	breeding
BW483	2013	2008-2015	FALSE	breeding
BW484	2012	2008-2015	FALSE	breeding
BW485	2014	2008-2015	FALSE	breeding
BW499	2015	2008-2015	FALSE	breeding
BW5043	2018	2016-2024	FALSE	breeding
BW5060	2019	2016-2024	FALSE	breeding
BW5095	2024	2016-2024	FALSE	breeding
BW688	1994	1992-1999	FALSE	breeding
BW693	1997	1992-1999	FALSE	breeding
BW748	1999	1992-1999	FALSE	breeding
BW828	2004	2000-2007	FALSE	breeding
BW864	2006	2000-2007	FALSE	breeding
BW871	2009	2008-2015	FALSE	breeding
BW872	2007	2000-2007	FALSE	breeding
BW873	2007	2000-2007	FALSE	breeding
BW897	2008	2008-2015	FALSE	breeding
BW914	2009	2008-2015	FALSE	breeding
BW928	2010	2008-2015	FALSE	breeding
BW961	2015	2008-2015	FALSE	breeding
BW994	2016	2016-2024	FALSE	breeding
CDCSKRUSH	2022	2016-2024	FALSE	breeding
CHRIS	1992	1992-1999	TRUE	susceptible
COTEAU	2004	2000-2007	FALSE	breeding
CROMWELL	2004	2000-2007	FALSE	breeding
D940098	1998	1992-1999	FALSE	breeding
D941229	1998	1992-1999	FALSE	breeding
D941515	1998	1992-1999	FALSE	breeding
D95565	2000	2000-2007	FALSE	breeding
D96596	2000	2000-2007	FALSE	breeding
D96622	2000	2000-2007	FALSE	breeding
DAPPS	1999	1992-1999	FALSE	breeding
DH98031	1999	1992-1999	FALSE	breeding
DH98052	1999	1992-1999	FALSE	breeding
DH98053	1999	1992-1999	FALSE	breeding
DH98069	1999	1992-1999	FALSE	breeding
DRIVER	2017	2016-2024	FALSE	breeding
EMBER	1996	1992-1999	FALSE	breeding
ERA	1992	1992-1999	FALSE	breeding
ES101	2007	2000-2007	FALSE	breeding
ES63	2004	2000-2007	FALSE	breeding
ES66	2001	2000-2007	FALSE	breeding
ES95	2007	2000-2007	FALSE	breeding
FALLER	2009	2008-2015	FALSE	breeding
FN09-17017	2010	2008-2015	FALSE	breeding
FN09-17210	2010	2008-2015	FALSE	breeding
FN09-17213	2010	2008-2015	FALSE	breeding
FN09-17270	2010	2008-2015	FALSE	breeding
FN09-17275	2010	2008-2015	FALSE	breeding
FN1706-185	2007	2000-2007	FALSE	breeding
FN1706-213	2007	2000-2007	FALSE	breeding
FN1706-38	2007	2000-2007	FALSE	breeding
FOCUS	2014	2008-2015	FALSE	breeding
FOREFRONT	2009	2008-2015	FALSE	breeding
FORGE	1994	1992-1999	FALSE	breeding
GLENN	2003	2000-2007	FALSE	breeding
HJ98	1994	1992-1999	FALSE	breeding
HOWARD	2003	2000-2007	FALSE	breeding
HY1319	2013	2008-2015	FALSE	breeding
HY2019	2014	2008-2015	FALSE	breeding
HY2136	2024	2016-2024	FALSE	breeding
HY417	1995	1992-1999	FALSE	breeding
HY469	2002	2000-2007	FALSE	breeding
HY644	1999	1992-1999	FALSE	breeding
HY682	2007	2000-2007	FALSE	breeding
HY688	2004	2000-2007	FALSE	breeding
HY689	2007	2000-2007	FALSE	breeding
HY699	2004	2000-2007	FALSE	breeding
INGOT	1995	1992-1999	FALSE	breeding
KATEPWA	1995	1992-1999	FALSE	breeding
KEENE	1993	1992-1999	TRUE	susceptible
KULM	1992	1992-1999	FALSE	breeding
LANGDON	1998	1992-1999	FALSE	breeding
LANG-MN	2013	2008-2015	FALSE	breeding
LANNING	2019	2016-2024	FALSE	breeding
LCS-BREAKAWAY	2006	2000-2007	FALSE	breeding
LINKERT	2009	2008-2015	TRUE	resistant
MARQUIS	1992	1992-1999	TRUE	susceptible
MARSHALL	1993	1992-1999	FALSE	breeding
MCVEY	1996	1992-1999	TRUE	resistant
MN00021	2002	2000-2007	FALSE	breeding
MN00173	2002	2000-2007	FALSE	breeding
MN00187-3	2004	2000-2007	FALSE	breeding
MN00209-3-1	2006	2000-2007	FALSE	breeding
MN00232-2	2003	2000-2007	FALSE	breeding
MN00269	2001	2000-2007	TRUE	susceptible
MN002698	2017	2016-2024	FALSE	breeding
MN00274	2002	2000-2007	FALSE	breeding
MN01057-3-1	2005	2000-2007	FALSE	breeding
MN01116	2003	2000-2007	FALSE	breeding
MN01164	2004	2000-2007	FALSE	breeding
MN01180	2003	2000-2007	FALSE	breeding
MN01197	2004	2000-2007	FALSE	breeding
MN01281	2003	2000-2007	FALSE	breeding
MN01333-A	2004	2000-2007	FALSE	breeding
MN01380-2-1	2005	2000-2007	FALSE	breeding
MN01NIL84-5-5-15	2004	2000-2007	FALSE	breeding
MN01X074-14	2007	2000-2007	FALSE	breeding
MN02051-1	2005	2000-2007	FALSE	breeding
MN02072	2005	2000-2007	FALSE	breeding
MN02219-1	2005	2000-2007	FALSE	breeding
MN02222-1	2006	2000-2007	FALSE	breeding
MN02252-A	2005	2000-2007	FALSE	breeding
MN02255	2006	2000-2007	FALSE	breeding
MN02268-A-4	2006	2000-2007	FALSE	breeding
MN02306-2	2005	2000-2007	FALSE	breeding
MN03013-3-2	2007	2000-2007	FALSE	breeding
MN03119-4	2007	2000-2007	FALSE	breeding
MN03169-2-062	2008	2008-2015	FALSE	breeding
MN03191-2-1	2007	2000-2007	FALSE	breeding
MN03306-1	2006	2000-2007	FALSE	breeding
MN03308-4	2007	2000-2007	FALSE	breeding
MN03342-4	2008	2008-2015	FALSE	breeding
MN05058	2008	2008-2015	FALSE	breeding
MN05117-7	2008	2008-2015	FALSE	breeding
MN05141-2	2008	2008-2015	FALSE	breeding
MN05149-5	2008	2008-2015	FALSE	breeding
MN05152-1-1	2009	2008-2015	FALSE	breeding
MN06018	2009	2008-2015	FALSE	breeding
MN06049-1-3	2009	2008-2015	FALSE	breeding
MN06075-4	2010	2008-2015	FALSE	breeding
MN06202-3-1	2009	2008-2015	FALSE	breeding
MN06213-6-2-4	2009	2008-2015	FALSE	breeding
MN06216-6-2-4	2010	2008-2015	FALSE	breeding
MN06219-2-2	2009	2008-2015	FALSE	breeding
MN07049-7-3	2010	2008-2015	FALSE	breeding
MN07057-6-4	2011	2008-2015	FALSE	breeding
MN07167W-2-1	2011	2008-2015	FALSE	breeding
MN07183-3	2010	2008-2015	FALSE	breeding
MN08124	2010	2008-2015	FALSE	breeding
MN08145	2010	2008-2015	FALSE	breeding
MN08145-2-3	2010	2008-2015	FALSE	breeding
MN08166	2012	2008-2015	FALSE	breeding
MN08173	2012	2008-2015	FALSE	breeding
MN09023	2011	2008-2015	FALSE	breeding
MN09027	2012	2008-2015	FALSE	breeding
MN09028-1	2013	2008-2015	FALSE	breeding
MN09071	2012	2008-2015	FALSE	breeding
MN09092	2011	2008-2015	FALSE	breeding
MN09121	2012	2008-2015	FALSE	breeding
MN09157	2013	2008-2015	FALSE	breeding
MN09186	2013	2008-2015	FALSE	breeding
MN10021	2014	2008-2015	FALSE	breeding
MN10055	2013	2008-2015	FALSE	breeding
MN10061	2013	2008-2015	FALSE	breeding
MN10204-6	2013	2008-2015	FALSE	breeding
MN10281-1-98	2015	2008-2015	FALSE	breeding
MN10281-1-A	2014	2008-2015	FALSE	breeding
MN10285	2013	2008-2015	FALSE	breeding
MN10362	2013	2008-2015	FALSE	breeding
MN10368	2013	2008-2015	FALSE	breeding
MN10388	2014	2008-2015	FALSE	breeding
MN11074	2014	2008-2015	FALSE	breeding
MN11326-3	2015	2008-2015	FALSE	breeding
MN11394-6	2014	2008-2015	FALSE	breeding
MN11397-1	2014	2008-2015	FALSE	breeding
MN11405	2014	2008-2015	FALSE	breeding
MN11492-6	2015	2008-2015	FALSE	breeding
MN12265-1	2015	2008-2015	FALSE	breeding
MN12307-3	2015	2008-2015	FALSE	breeding
MN12423-5	2015	2008-2015	FALSE	breeding
MN12545-3	2015	2008-2015	FALSE	breeding
MN13056-7	2016	2016-2024	FALSE	breeding
MN13064-2	2016	2016-2024	FALSE	breeding
MN13074-4	2016	2016-2024	FALSE	breeding
MN13288-1	2017	2016-2024	FALSE	breeding
MN13288-1-32	2018	2016-2024	FALSE	breeding
MN13304-5	2017	2016-2024	FALSE	breeding
MN13398-2	2016	2016-2024	FALSE	breeding
MN13479-8	2016	2016-2024	FALSE	breeding
MN13515-8	2016	2016-2024	FALSE	breeding
MN14138-4	2017	2016-2024	FALSE	breeding
MN14164-4	2017	2016-2024	FALSE	breeding
MN14227-4	2017	2016-2024	FALSE	breeding
MN14470-5	2017	2016-2024	FALSE	breeding
MN14669-1	2017	2016-2024	FALSE	breeding
MN15008-7	2018	2016-2024	FALSE	breeding
MN15012-3	2019	2016-2024	FALSE	breeding
MN15029-8	2018	2016-2024	FALSE	breeding
MN15089-2	2018	2016-2024	FALSE	breeding
MN15119-2	2019	2016-2024	FALSE	breeding
MN15136-6	2019	2016-2024	FALSE	breeding
MN15155-2	2019	2016-2024	FALSE	breeding
MN15195-5	2018	2016-2024	FALSE	breeding
MN15219-2	2018	2016-2024	FALSE	breeding
MN15501-4	2018	2016-2024	FALSE	breeding
MN16028	2019	2016-2024	FALSE	breeding
MN16040	2019	2016-2024	FALSE	breeding
MN16103-1	2020	2016-2024	FALSE	breeding
MN16262-3	2019	2016-2024	FALSE	breeding
MN16277-3	2020	2016-2024	FALSE	breeding
MN16317-5	2019	2016-2024	FALSE	breeding
MN16340-8	2020	2016-2024	FALSE	breeding
MN16360-1	2020	2016-2024	FALSE	breeding
MN16408-5	2020	2016-2024	FALSE	breeding
MN17033-1	2021	2016-2024	FALSE	breeding
MN17038-5	2021	2016-2024	FALSE	breeding
MN17065-2	2022	2016-2024	FALSE	breeding
MN17117-5	2020	2016-2024	FALSE	breeding
MN17118-1	2021	2016-2024	FALSE	breeding
MN17120-1	2020	2016-2024	FALSE	breeding
MN17271-1	2021	2016-2024	FALSE	breeding
MN17332-2	2021	2016-2024	FALSE	breeding
MN17379-4	2020	2016-2024	FALSE	breeding
MN18032-5	2022	2016-2024	FALSE	breeding
MN18081-5	2022	2016-2024	FALSE	breeding
MN18091-2	2023	2016-2024	FALSE	breeding
MN18106-2	2022	2016-2024	FALSE	breeding
MN18163-5	2022	2016-2024	FALSE	breeding
MN18176-1	2022	2016-2024	FALSE	breeding
MN18179-4	2022	2016-2024	FALSE	breeding
MN18292-3	2022	2016-2024	FALSE	breeding
MN19104-2	2023	2016-2024	FALSE	breeding
MN19108-1	2023	2016-2024	FALSE	breeding
MN19114-3	2023	2016-2024	FALSE	breeding
MN19138-2	2023	2016-2024	FALSE	breeding
MN19146-4	2023	2016-2024	FALSE	breeding
MN19239-1	2023	2016-2024	FALSE	breeding
MN19257-1	2023	2016-2024	FALSE	breeding
MN19342-1	2024	2016-2024	FALSE	breeding
MN19358-1	2023	2016-2024	FALSE	breeding
MN20038-3	2024	2016-2024	FALSE	breeding
MN20049-1	2024	2016-2024	FALSE	breeding
MN20080-3	2024	2016-2024	FALSE	breeding
MN20081-2	2024	2016-2024	FALSE	breeding
MN20171-1	2024	2016-2024	FALSE	breeding
MN20172-2	2024	2016-2024	FALSE	breeding
MN20218-3	2024	2016-2024	FALSE	breeding
MN20231-2	2023	2016-2024	FALSE	breeding
MN2514	1995	1992-1999	FALSE	breeding
MN2538	1995	1992-1999	FALSE	breeding
MN2540	1996	1992-1999	FALSE	breeding
MN88076	1992	1992-1999	FALSE	breeding
MN88334	1992	1992-1999	FALSE	breeding
MN88415	1992	1992-1999	FALSE	breeding
MN89028	1992	1992-1999	FALSE	breeding
MN89103	1993	1992-1999	FALSE	breeding
MN89408	1992	1992-1999	FALSE	breeding
MN90071	1993	1992-1999	FALSE	breeding
MN90114	1993	1992-1999	FALSE	breeding
MN90138	1994	1992-1999	FALSE	breeding
MN90253	1993	1992-1999	FALSE	breeding
MN91227	1994	1992-1999	FALSE	breeding
MN91309	1994	1992-1999	FALSE	breeding
MN91324	1994	1992-1999	FALSE	breeding
MN92006	1994	1992-1999	FALSE	breeding
MN92387	1995	1992-1999	FALSE	breeding
MN93377	1996	1992-1999	FALSE	breeding
MN93434	1996	1992-1999	FALSE	breeding
MN94055	1997	1992-1999	FALSE	breeding
MN94200	1997	1992-1999	FALSE	breeding
MN94346	1997	1992-1999	FALSE	breeding
MN94351	1996	1992-1999	FALSE	breeding
MN94382	1995	1992-1999	FALSE	breeding
MN94390	1995	1992-1999	FALSE	breeding
MN95124	1997	1992-1999	FALSE	breeding
MN95142	1997	1992-1999	FALSE	breeding
MN95211	1997	1992-1999	FALSE	breeding
MN95286	1998	1992-1999	FALSE	breeding
MN97039	2000	2000-2007	FALSE	breeding
MN97063	2001	2000-2007	FALSE	breeding
MN97073	2000	2000-2007	FALSE	breeding
MN97237	1998	1992-1999	FALSE	breeding
MN97448	2000	2000-2007	FALSE	breeding
MN97518	1999	1992-1999	FALSE	breeding
MN97561	2000	2000-2007	FALSE	breeding
MN97596	1999	1992-1999	FALSE	breeding
MN97603	1999	1992-1999	FALSE	breeding
MN97695-4	2002	2000-2007	FALSE	breeding
MN97762	1998	1992-1999	FALSE	breeding
MN97847	1998	1992-1999	FALSE	breeding
MN98037	2000	2000-2007	FALSE	breeding
MN98068	1999	1992-1999	FALSE	breeding
MN98092	2000	2000-2007	FALSE	breeding
MN98208	2000	2000-2007	FALSE	breeding
MN98389	2000	2000-2007	FALSE	breeding
MN98389-A	2002	2000-2007	FALSE	breeding
MN98513	1999	1992-1999	FALSE	breeding
MN99109	2001	2000-2007	FALSE	breeding
MN99112	2001	2000-2007	FALSE	breeding
MN99126	2001	2000-2007	FALSE	breeding
MN99192	2001	2000-2007	FALSE	breeding
MN99220-4	2004	2000-2007	FALSE	breeding
MN99225	2002	2000-2007	FALSE	breeding
MN99322	2001	2000-2007	FALSE	breeding
MN99341-2-5	2004	2000-2007	FALSE	breeding
MN99408	2002	2000-2007	FALSE	breeding
MN99433-1	2003	2000-2007	FALSE	breeding
MN-ROTHSAY	2018	2016-2024	FALSE	breeding
MN-TORGY	2017	2016-2024	FALSE	breeding
MN-WASHBURN	2014	2008-2015	FALSE	breeding
MO_09_3-5	2014	2008-2015	FALSE	breeding
MO_1-2	2009	2008-2015	FALSE	breeding
MO_1-23	2009	2008-2015	FALSE	breeding
MO_1-24	2009	2008-2015	FALSE	breeding
MO_1-3	2009	2008-2015	FALSE	breeding
MO_3-23	2009	2008-2015	FALSE	breeding
MO_3-4	2014	2008-2015	FALSE	breeding
MO3_3-23	2009	2008-2015	FALSE	breeding
MO5_1-14	2005	2000-2007	FALSE	breeding
MO5_1-15	2005	2000-2007	FALSE	breeding
MO5_1-16	2005	2000-2007	FALSE	breeding
MO5_1-17	2005	2000-2007	FALSE	breeding
MO5_1-18	2005	2000-2007	FALSE	breeding
MO5_1-2	2009	2008-2015	FALSE	breeding
MO5_1-3	2009	2008-2015	FALSE	breeding
MO6_1-23	2009	2008-2015	FALSE	breeding
MO6_1-24	2009	2008-2015	FALSE	breeding
MO8_3-4	2014	2008-2015	FALSE	breeding
MOTT	2006	2000-2007	FALSE	breeding
MT0245	2004	2000-2007	FALSE	breeding
MT0249	2004	2000-2007	FALSE	breeding
MT0266	2005	2000-2007	FALSE	breeding
MT03501487	2005	2000-2007	FALSE	breeding
MT03501736	2005	2000-2007	FALSE	breeding
MT03502405	2005	2000-2007	FALSE	breeding
MT03502420	2005	2000-2007	FALSE	breeding
MT03502445	2005	2000-2007	FALSE	breeding
MT0415	2006	2000-2007	FALSE	breeding
MT0416	2006	2000-2007	FALSE	breeding
MT0516	2007	2000-2007	FALSE	breeding
MT0713	2008	2008-2015	FALSE	breeding
MT0827	2010	2008-2015	FALSE	breeding
MT0832	2010	2008-2015	FALSE	breeding
MT0852	2010	2008-2015	FALSE	breeding
MT09SCAB16	2010	2008-2015	FALSE	breeding
MT09SCAB3	2010	2008-2015	FALSE	breeding
MT09SCAB5	2010	2008-2015	FALSE	breeding
MT09SCAB9	2010	2008-2015	FALSE	breeding
MT1053	2013	2008-2015	FALSE	breeding
MT1103	2014	2008-2015	FALSE	breeding
MT1142	2013	2008-2015	FALSE	breeding
MT1172	2013	2008-2015	FALSE	breeding
MT1203	2014	2008-2015	FALSE	breeding
MT1219	2015	2008-2015	FALSE	breeding
MT1236	2014	2008-2015	FALSE	breeding
MT1316	2015	2008-2015	FALSE	breeding
MT1337	2015	2008-2015	FALSE	breeding
MT1338	2015	2008-2015	FALSE	breeding
MT1348	2016	2016-2024	FALSE	breeding
MT1401	2016	2016-2024	FALSE	breeding
MT1525	2017	2016-2024	FALSE	breeding
MT1543	2017	2016-2024	FALSE	breeding
MT1570	2017	2016-2024	FALSE	breeding
MT1621	2018	2016-2024	FALSE	breeding
MT1673	2018	2016-2024	FALSE	breeding
MT1716	2019	2016-2024	FALSE	breeding
MT1767	2019	2016-2024	FALSE	breeding
MT1775	2020	2016-2024	FALSE	breeding
MT1809	2020	2016-2024	FALSE	breeding
MT1855	2020	2016-2024	FALSE	breeding
MT1866	2020	2016-2024	FALSE	breeding
MT1871	2020	2016-2024	FALSE	breeding
MT1872	2020	2016-2024	FALSE	breeding
MT1927	2021	2016-2024	FALSE	breeding
MT1939	2021	2016-2024	FALSE	breeding
MT2007	2021	2016-2024	FALSE	breeding
MT2013	2021	2016-2024	FALSE	breeding
MT2018	2021	2016-2024	FALSE	breeding
MT2022	2021	2016-2024	FALSE	breeding
MT2030	2022	2016-2024	FALSE	breeding
MT2049	2022	2016-2024	FALSE	breeding
MT2050	2023	2016-2024	FALSE	breeding
MT2054	2022	2016-2024	FALSE	breeding
MT2063	2023	2016-2024	FALSE	breeding
MT21074	2024	2016-2024	FALSE	breeding
MT21076	2022	2016-2024	FALSE	breeding
MT21082	2022	2016-2024	FALSE	breeding
MT21089	2022	2016-2024	FALSE	breeding
MT21091	2022	2016-2024	FALSE	breeding
MT21102	2022	2016-2024	FALSE	breeding
MT21104	2023	2016-2024	FALSE	breeding
MT21111	2022	2016-2024	FALSE	breeding
MT21186	2024	2016-2024	FALSE	breeding
MT21214	2023	2016-2024	FALSE	breeding
MT21220	2023	2016-2024	FALSE	breeding
MT21222	2023	2016-2024	FALSE	breeding
MT21224	2024	2016-2024	FALSE	breeding
MT21305	2023	2016-2024	FALSE	breeding
MT21352	2023	2016-2024	FALSE	breeding
MT21384	2023	2016-2024	FALSE	breeding
MT21473	2024	2016-2024	FALSE	breeding
MT21485	2024	2016-2024	FALSE	breeding
MT22071	2024	2016-2024	FALSE	breeding
MT22345	2024	2016-2024	FALSE	breeding
MT22361	2024	2016-2024	FALSE	breeding
MT23004	2024	2016-2024	FALSE	breeding
MT23297	2024	2016-2024	FALSE	breeding
MT8849	1992	1992-1999	FALSE	breeding
MT9311	1996	1992-1999	FALSE	breeding
MT9354	1995	1992-1999	FALSE	breeding
MT9360	1995	1992-1999	FALSE	breeding
MT9410	1996	1992-1999	FALSE	breeding
MT9508	1997	1992-1999	FALSE	breeding
MT9609	1998	1992-1999	FALSE	breeding
MT9874	2001	2000-2007	FALSE	breeding
MT9929	2002	2000-2007	FALSE	breeding
ND03_1-13	2005	2000-2007	FALSE	breeding
ND03_1-15	2003	2000-2007	FALSE	breeding
ND03_1-9	2003	2000-2007	FALSE	breeding
ND04_3-18	2005	2000-2007	FALSE	breeding
ND04_3-19	2005	2000-2007	FALSE	breeding
ND04_3-20	2006	2000-2007	FALSE	breeding
ND04_3-21	2006	2000-2007	FALSE	breeding
ND05_1-1	2007	2000-2007	FALSE	breeding
ND05_1-2	2007	2000-2007	FALSE	breeding
ND05_1-3	2007	2000-2007	FALSE	breeding
ND07_3-10	2008	2008-2015	FALSE	breeding
ND07_3-11	2008	2008-2015	FALSE	breeding
ND07_3-12	2008	2008-2015	FALSE	breeding
ND08_3-11	2008	2008-2015	FALSE	breeding
ND08_3-12	2008	2008-2015	FALSE	breeding
ND09_URSN-1	2009	2008-2015	FALSE	breeding
ND09_URSN-2	2009	2008-2015	FALSE	breeding
ND09_URSN-3	2009	2008-2015	FALSE	breeding
ND09_URSN-4	2009	2008-2015	FALSE	breeding
ND09_URSN-5	2009	2008-2015	FALSE	breeding
ND2603	1995	1992-1999	FALSE	breeding
ND2604	1995	1992-1999	FALSE	breeding
ND2710	1996	1992-1999	TRUE	resistant
ND2713	1995	1992-1999	FALSE	breeding
ND2729	1995	1992-1999	FALSE	breeding
ND2731	1995	1992-1999	FALSE	breeding
ND2736	1996	1992-1999	FALSE	breeding
ND2763	1996	1992-1999	FALSE	breeding
ND2764	1996	1992-1999	FALSE	breeding
ND2790	2003	2000-2007	FALSE	breeding
ND2827	1997	1992-1999	FALSE	breeding
ND2831	1999	1992-1999	FALSE	breeding
ND2836	1997	1992-1999	FALSE	breeding
ND2852	1998	1992-1999	FALSE	breeding
ND2891	1998	1992-1999	FALSE	breeding
ND2897	1998	1992-1999	FALSE	breeding
ND2906	1998	1992-1999	FALSE	breeding
ND2928	1999	1992-1999	FALSE	breeding
ND2941	1999	1992-1999	FALSE	breeding
ND2955	2000	2000-2007	FALSE	breeding
ND2959	2000	2000-2007	FALSE	breeding
ND2978	2001	2000-2007	FALSE	breeding
ND3006	2000	2000-2007	FALSE	breeding
ND3015	2003	2000-2007	FALSE	breeding
ND3020	2002	2000-2007	FALSE	breeding
ND3035	2001	2000-2007	FALSE	breeding
ND3043	2001	2000-2007	FALSE	breeding
ND3044	2001	2000-2007	FALSE	breeding
ND3078	2002	2000-2007	FALSE	breeding
ND3085	2002	2000-2007	FALSE	breeding
ND3088	2002	2000-2007	FALSE	breeding
ND3098	2002	2000-2007	FALSE	breeding
ND674	1993	1992-1999	FALSE	breeding
ND675	1992	1992-1999	FALSE	breeding
ND681	1992	1992-1999	FALSE	breeding
ND682	1992	1992-1999	FALSE	breeding
ND686	1994	1992-1999	FALSE	breeding
ND688	1995	1992-1999	FALSE	breeding
ND691	1996	1992-1999	FALSE	breeding
ND692	1996	1992-1999	FALSE	breeding
ND704	1997	1992-1999	FALSE	breeding
ND705	1998	1992-1999	FALSE	breeding
ND706	1998	1992-1999	FALSE	breeding
ND709-9	1999	1992-1999	FALSE	breeding
ND712-12	2000	2000-2007	FALSE	breeding
ND721	1999	1992-1999	FALSE	breeding
ND726	1999	1992-1999	FALSE	breeding
ND729	2000	2000-2007	FALSE	breeding
ND739	2002	2000-2007	FALSE	breeding
ND740	2001	2000-2007	FALSE	breeding
ND742	2001	2000-2007	FALSE	breeding
ND743	2001	2000-2007	FALSE	breeding
ND744	2002	2000-2007	FALSE	breeding
ND749	2002	2000-2007	FALSE	breeding
ND750	2002	2000-2007	FALSE	breeding
ND751	2003	2000-2007	FALSE	breeding
ND801	2003	2000-2007	FALSE	breeding
ND819	2015	2008-2015	FALSE	breeding
ND820	2015	2008-2015	FALSE	breeding
ND821	2015	2008-2015	FALSE	breeding
ND822	2015	2008-2015	FALSE	breeding
ND823	2015	2008-2015	FALSE	breeding
ND824	2016	2016-2024	FALSE	breeding
ND828	2016	2016-2024	FALSE	breeding
ND830	2017	2016-2024	FALSE	breeding
ND833	2017	2016-2024	FALSE	breeding
NDFROHBERG	2023	2016-2024	FALSE	breeding
ND-HERON	2019	2016-2024	FALSE	breeding
NDHRS11-0244-0001	2021	2016-2024	FALSE	breeding
NDHRS12-1031-0007	2021	2016-2024	FALSE	breeding
NDHRS13-0100-C01	2022	2016-2024	FALSE	breeding
NDHRS13-0114-C06	2020	2016-2024	FALSE	breeding
NDHRS13-0121-C05	2020	2016-2024	FALSE	breeding
NDHRS13-0156-C04	2021	2016-2024	FALSE	breeding
NDHRS13-0170-0004	2019	2016-2024	FALSE	breeding
NDHRS13-0177-0001	2021	2016-2024	FALSE	breeding
NDHRS13-0215-C03	2020	2016-2024	FALSE	breeding
NDHRS13-0309-B03	2021	2016-2024	FALSE	breeding
NDHRS13-0318-0003	2020	2016-2024	FALSE	breeding
NDHRS14-0134-C03	2021	2016-2024	FALSE	breeding
NDHRS14-0134-C09	2022	2016-2024	FALSE	breeding
NDHRS14-0136-C06	2019	2016-2024	FALSE	breeding
NDHRS15-0006-B02	2023	2016-2024	FALSE	breeding
NDHRS15-0006-C29	2023	2016-2024	FALSE	breeding
NDHRS15-0006-C46	2022	2016-2024	FALSE	breeding
NDHRS15-0037-C52	2023	2016-2024	FALSE	breeding
NDHRS15-0405-C34	2023	2016-2024	FALSE	breeding
NDHRS16-12-19	2017	2016-2024	FALSE	breeding
NDHRS16-12-31	2017	2016-2024	FALSE	breeding
NDHRS16-12-52	2017	2016-2024	FALSE	breeding
NDHRS16-13-13	2018	2016-2024	FALSE	breeding
NDHRS16-13-29	2018	2016-2024	FALSE	breeding
NDHRS16-13-89	2018	2016-2024	FALSE	breeding
NDHRS16-13-97	2018	2016-2024	FALSE	breeding
NDHRS16-14-12	2018	2016-2024	FALSE	breeding
NDHRS16-14-36	2019	2016-2024	FALSE	breeding
NDHRS16-14-41	2018	2016-2024	FALSE	breeding
NDHRS16-14-91	2018	2016-2024	FALSE	breeding
NDHRS16-15-320	2020	2016-2024	FALSE	breeding
NDHRS16-16-654	2020	2016-2024	FALSE	breeding
NDHRS16-16-665	2019	2016-2024	FALSE	breeding
NDHRS16-16-678	2020	2016-2024	FALSE	breeding
NDHRS16RIL-0190-019	2023	2016-2024	FALSE	breeding
NDHRS17-0149-C17	2023	2016-2024	FALSE	breeding
NDHRS17-0346-B11	2023	2016-2024	FALSE	breeding
NDHRS17-0596-B28	2021	2016-2024	FALSE	breeding
NDHRS17DH-0467-056	2021	2016-2024	FALSE	breeding
NDHRS18-0039-B081	2024	2016-2024	FALSE	breeding
NDHRS18-0069-B066	2024	2016-2024	FALSE	breeding
NDHRS18-0069-B077	2024	2016-2024	FALSE	breeding
NDHRS18-0105-B080	2024	2016-2024	FALSE	breeding
NDHRS18-0178-B057	2024	2016-2024	FALSE	breeding
NDHRS18-0180-B101	2024	2016-2024	FALSE	breeding
NDHRS18-0187-C042	2024	2016-2024	FALSE	breeding
NDHRS18-0261-B234	2024	2016-2024	FALSE	breeding
NDHRS18-6306-C01	2024	2016-2024	FALSE	breeding
NDHRS19RIL-0121-212-1	2024	2016-2024	FALSE	breeding
NDSURF2398	2005	2000-2007	FALSE	breeding
NDSW0217	2004	2000-2007	FALSE	breeding
NDSW0246	2002	2000-2007	FALSE	breeding
NDSW0345	2004	2000-2007	FALSE	breeding
NDSW0347	2004	2000-2007	FALSE	breeding
NDSW0348	2005	2000-2007	FALSE	breeding
NDSW0350	2005	2000-2007	FALSE	breeding
NDSW0430	2006	2000-2007	FALSE	breeding
NDSW0481	2006	2000-2007	FALSE	breeding
NDSW0501	2008	2008-2015	FALSE	breeding
NDSW0601	2007	2000-2007	FALSE	breeding
NDSW0612	2009	2008-2015	FALSE	breeding
NDSW0701	2009	2008-2015	FALSE	breeding
NDSW0702	2009	2008-2015	FALSE	breeding
NDSW0703	2009	2008-2015	FALSE	breeding
NDSW0714	2007	2000-2007	FALSE	breeding
NDSW0715	2007	2000-2007	FALSE	breeding
NDSW16027	2019	2016-2024	FALSE	breeding
ND-THRESHER	2020	2016-2024	FALSE	breeding
ND-VITPRO	2016	2016-2024	FALSE	breeding
NH027	2018	2016-2024	FALSE	breeding
NH056	2019	2016-2024	FALSE	breeding
NH057	2019	2016-2024	FALSE	breeding
NH058	2019	2016-2024	FALSE	breeding
NH069	2021	2016-2024	FALSE	breeding
NORDEN	2007	2000-2007	FALSE	breeding
NORM	1997	1992-1999	TRUE	susceptible
OKLEE	1998	1992-1999	FALSE	breeding
OXEN	1993	1992-1999	FALSE	breeding
PARSHALL	1996	1992-1999	FALSE	breeding
PREVAIL	2013	2008-2015	FALSE	breeding
PROSPECT	1995	1992-1999	FALSE	breeding
PROSPER	2019	2016-2024	FALSE	breeding
PT436	2006	2000-2007	FALSE	breeding
RB07	2003	2000-2007	FALSE	breeding
REEDER	1996	1992-1999	FALSE	breeding
RIL39	2007	2000-2007	FALSE	breeding
RIL60	2007	2000-2007	FALSE	breeding
RIL64	2007	2000-2007	FALSE	breeding
RIL80	2007	2000-2007	FALSE	breeding
RIL83	2007	2000-2007	FALSE	breeding
RL4927	2000	2000-2007	FALSE	breeding
RL4970	2000	2000-2007	FALSE	breeding
RL4972	2000	2000-2007	FALSE	breeding
ROBLIN	1998	1992-1999	TRUE	susceptible
ROLLAG	2009	2008-2015	TRUE	resistant
RUSS	1993	1992-1999	FALSE	breeding
SABIN	2006	2000-2007	FALSE	breeding
SBE0444	1993	1992-1999	FALSE	breeding
SBF0402	1995	1992-1999	FALSE	breeding
SCHOLAR	1996	1992-1999	FALSE	breeding
SD0005	1993	1992-1999	FALSE	breeding
SD0007	1994	1992-1999	FALSE	breeding
SD0014	1994	1992-1999	FALSE	breeding
SD3056	1992	1992-1999	FALSE	breeding
SD31219	1995	1992-1999	FALSE	breeding
SD3151	1994	1992-1999	FALSE	breeding
SD3161	1995	1992-1999	FALSE	breeding
SD3164	1995	1992-1999	FALSE	breeding
SD3165	1995	1992-1999	FALSE	breeding
SD3195	1995	1992-1999	FALSE	breeding
SD3236	1995	1992-1999	FALSE	breeding
SD3247	1995	1992-1999	FALSE	breeding
SD3290	1996	1992-1999	FALSE	breeding
SD3300	1996	1992-1999	FALSE	breeding
SD3310	1997	1992-1999	FALSE	breeding
SD3317	1996	1992-1999	FALSE	breeding
SD3330	1996	1992-1999	FALSE	breeding
SD3345	1998	1992-1999	FALSE	breeding
SD3347	1997	1992-1999	FALSE	breeding
SD3355	1997	1992-1999	FALSE	breeding
SD3356	1998	1992-1999	FALSE	breeding
SD3407	1999	1992-1999	FALSE	breeding
SD3414	1999	1992-1999	FALSE	breeding
SD3415	1998	1992-1999	FALSE	breeding
SD3423	1998	1992-1999	FALSE	breeding
SD3452	1998	1992-1999	FALSE	breeding
SD3496	2000	2000-2007	FALSE	breeding
SD3506	2000	2000-2007	FALSE	breeding
SD3521	1999	1992-1999	FALSE	breeding
SD3522	2000	2000-2007	FALSE	breeding
SD3523	1999	1992-1999	FALSE	breeding
SD3524	2000	2000-2007	FALSE	breeding
SD3533	2002	2000-2007	FALSE	breeding
SD3540	2001	2000-2007	FALSE	breeding
SD3561	2000	2000-2007	FALSE	breeding
SD3562	2000	2000-2007	FALSE	breeding
SD3588	2000	2000-2007	FALSE	breeding
SD3599	2001	2000-2007	FALSE	breeding
SD3618	2003	2000-2007	FALSE	breeding
SD3623	2002	2000-2007	FALSE	breeding
SD3624	2001	2000-2007	FALSE	breeding
SD3635	2003	2000-2007	FALSE	breeding
SD3641	2002	2000-2007	FALSE	breeding
SD3650	2001	2000-2007	FALSE	breeding
SD3657	2001	2000-2007	FALSE	breeding
SD3666	2001	2000-2007	FALSE	breeding
SD3668	2004	2000-2007	FALSE	breeding
SD3686	2002	2000-2007	FALSE	breeding
SD3692	2002	2000-2007	FALSE	breeding
SD3696	2002	2000-2007	FALSE	breeding
SD3718	2002	2000-2007	FALSE	breeding
SD3739	2003	2000-2007	FALSE	breeding
SD3746	2003	2000-2007	FALSE	breeding
SD3747	2004	2000-2007	FALSE	breeding
SD3754	2003	2000-2007	FALSE	breeding
SD3776	2003	2000-2007	FALSE	breeding
SD3784	2003	2000-2007	FALSE	breeding
SD3854	2005	2000-2007	FALSE	breeding
SD3868	2005	2000-2007	FALSE	breeding
SD3870	2005	2000-2007	FALSE	breeding
SD3895	2004	2000-2007	FALSE	breeding
SD3901	2004	2000-2007	FALSE	breeding
SD3911	2004	2000-2007	FALSE	breeding
SD3924	2004	2000-2007	FALSE	breeding
SD3934	2006	2000-2007	FALSE	breeding
SD3936	2004	2000-2007	FALSE	breeding
SD3942	2007	2000-2007	FALSE	breeding
SD3943	2006	2000-2007	FALSE	breeding
SD3944	2006	2000-2007	FALSE	breeding
SD3956	2007	2000-2007	FALSE	breeding
SD3973	2005	2000-2007	FALSE	breeding
SD3975	2005	2000-2007	FALSE	breeding
SD3979	2005	2000-2007	FALSE	breeding
SD3989	2005	2000-2007	FALSE	breeding
SD3991	2005	2000-2007	FALSE	breeding
SD4001	2006	2000-2007	FALSE	breeding
SD4011	2009	2008-2015	FALSE	breeding
SD4024	2008	2008-2015	FALSE	breeding
SD4027	2008	2008-2015	FALSE	breeding
SD4036	2008	2008-2015	FALSE	breeding
SD4041	2006	2000-2007	FALSE	breeding
SD4042	2006	2000-2007	FALSE	breeding
SD4059	2006	2000-2007	FALSE	breeding
SD4066	2006	2000-2007	FALSE	breeding
SD4073	2008	2008-2015	FALSE	breeding
SD4076	2009	2008-2015	FALSE	breeding
SD4112	2009	2008-2015	FALSE	breeding
SD4181	2008	2008-2015	FALSE	breeding
SD4182	2008	2008-2015	FALSE	breeding
SD4186	2008	2008-2015	FALSE	breeding
SD4189	2013	2008-2015	FALSE	breeding
SD4192	2008	2008-2015	FALSE	breeding
SD4313	2011	2008-2015	FALSE	breeding
SD4321	2013	2008-2015	FALSE	breeding
SD4331	2011	2008-2015	FALSE	breeding
SD4337	2011	2008-2015	FALSE	breeding
SD4338	2011	2008-2015	FALSE	breeding
SD4343	2011	2008-2015	FALSE	breeding
SD4361	2012	2008-2015	FALSE	breeding
SD4366	2012	2008-2015	FALSE	breeding
SD4388	2012	2008-2015	FALSE	breeding
SD4393	2014	2008-2015	FALSE	breeding
SD4394	2012	2008-2015	FALSE	breeding
SD4397	2012	2008-2015	FALSE	breeding
SD4403	2014	2008-2015	FALSE	breeding
SD4465	2016	2016-2024	FALSE	breeding
SD4471	2015	2008-2015	FALSE	breeding
SD4487	2013	2008-2015	FALSE	breeding
SD4492	2015	2008-2015	FALSE	breeding
SD4496	2015	2008-2015	FALSE	breeding
SD4504	2014	2008-2015	FALSE	breeding
SD4508	2014	2008-2015	FALSE	breeding
SD4510	2014	2008-2015	FALSE	breeding
SD4514	2014	2008-2015	FALSE	breeding
SD4518	2013	2008-2015	FALSE	breeding
SD4529	2016	2016-2024	FALSE	breeding
SD4536	2013	2008-2015	FALSE	breeding
SD4539	2016	2016-2024	FALSE	breeding
SD4541	2013	2008-2015	FALSE	breeding
SD4544	2013	2008-2015	FALSE	breeding
SD4546	2014	2008-2015	FALSE	breeding
SD4559	2015	2008-2015	FALSE	breeding
SD4579	2016	2016-2024	FALSE	breeding
SD4582	2015	2008-2015	FALSE	breeding
SD4587	2016	2016-2024	FALSE	breeding
SD4589	2016	2016-2024	FALSE	breeding
SD4595	2015	2008-2015	FALSE	breeding
SD4605	2015	2008-2015	FALSE	breeding
SD4607	2015	2008-2015	FALSE	breeding
SD4621	2016	2016-2024	FALSE	breeding
SD4645	2016	2016-2024	FALSE	breeding
SD4675	2016	2016-2024	FALSE	breeding
SD4691	2017	2016-2024	FALSE	breeding
SD4705	2017	2016-2024	FALSE	breeding
SD4706	2018	2016-2024	FALSE	breeding
SD4708	2018	2016-2024	FALSE	breeding
SD4710	2017	2016-2024	FALSE	breeding
SD4719	2018	2016-2024	FALSE	breeding
SD4721	2018	2016-2024	FALSE	breeding
SD4724	2017	2016-2024	FALSE	breeding
SD4740	2019	2016-2024	FALSE	breeding
SD4741	2017	2016-2024	FALSE	breeding
SD4756	2018	2016-2024	FALSE	breeding
SD4758	2018	2016-2024	FALSE	breeding
SD4772	2019	2016-2024	FALSE	breeding
SD4775	2019	2016-2024	FALSE	breeding
SD4787	2018	2016-2024	FALSE	breeding
SD4816	2019	2016-2024	FALSE	breeding
SD4819	2018	2016-2024	FALSE	breeding
SD4822	2018	2016-2024	FALSE	breeding
SD4834	2019	2016-2024	FALSE	breeding
SD4848	2020	2016-2024	FALSE	breeding
SD4852	2020	2016-2024	FALSE	breeding
SD4859	2019	2016-2024	FALSE	breeding
SD4865	2019	2016-2024	FALSE	breeding
SD4868	2019	2016-2024	FALSE	breeding
SD4871	2021	2016-2024	FALSE	breeding
SD4893	2022	2016-2024	FALSE	breeding
SD4894	2020	2016-2024	FALSE	breeding
SD4904	2020	2016-2024	FALSE	breeding
SD4905	2021	2016-2024	FALSE	breeding
SD4915	2020	2016-2024	FALSE	breeding
SD4917	2020	2016-2024	FALSE	breeding
SD4924	2022	2016-2024	FALSE	breeding
SD4926	2020	2016-2024	FALSE	breeding
SD4930	2022	2016-2024	FALSE	breeding
SD4933	2021	2016-2024	FALSE	breeding
SD4934	2021	2016-2024	FALSE	breeding
SD4944	2023	2016-2024	FALSE	breeding
SD4947	2020	2016-2024	FALSE	breeding
SD4949	2022	2016-2024	FALSE	breeding
SD4950	2020	2016-2024	FALSE	breeding
SD4968	2021	2016-2024	FALSE	breeding
SD4976	2021	2016-2024	FALSE	breeding
SD4991	2021	2016-2024	FALSE	breeding
SD5012	2021	2016-2024	FALSE	breeding
SD5030	2022	2016-2024	FALSE	breeding
SD5038	2022	2016-2024	FALSE	breeding
SD5050	2024	2016-2024	FALSE	breeding
SD5051	2022	2016-2024	FALSE	breeding
SD5072	2023	2016-2024	FALSE	breeding
SD5080	2023	2016-2024	FALSE	breeding
SD5082	2024	2016-2024	FALSE	breeding
SD5090	2023	2016-2024	FALSE	breeding
SD5096	2024	2016-2024	FALSE	breeding
SD5101	2023	2016-2024	FALSE	breeding
SD5103	2024	2016-2024	FALSE	breeding
SD5117	2023	2016-2024	FALSE	breeding
SD5119	2024	2016-2024	FALSE	breeding
SD5127	2023	2016-2024	FALSE	breeding
SD5131	2024	2016-2024	FALSE	breeding
SD5132	2023	2016-2024	FALSE	breeding
SD5145	2023	2016-2024	FALSE	breeding
SD5153	2024	2016-2024	FALSE	breeding
SD5158	2024	2016-2024	FALSE	breeding
SD5159	2023	2016-2024	FALSE	breeding
SD5193	2024	2016-2024	FALSE	breeding
SD5195	2024	2016-2024	FALSE	breeding
SD5203	2024	2016-2024	FALSE	breeding
SD5223	2024	2016-2024	FALSE	breeding
SD8070	1993	1992-1999	FALSE	breeding
SD8072	1993	1992-1999	FALSE	breeding
SD8074	1992	1992-1999	FALSE	breeding
SD8088	1995	1992-1999	FALSE	breeding
SD8089	1995	1992-1999	FALSE	breeding
SD8108	1996	1992-1999	FALSE	breeding
SD8114	1996	1992-1999	FALSE	breeding
SD8119	1997	1992-1999	FALSE	breeding
SD8670	1992	1992-1999	FALSE	breeding
SD8872	1992	1992-1999	FALSE	breeding
SD8973	1992	1992-1999	FALSE	breeding
SD-ADB54	1997	1992-1999	FALSE	breeding
SD-ADB61	1997	1992-1999	FALSE	breeding
SD-ADB9	1997	1992-1999	FALSE	breeding
SELECT	2007	2000-2007	FALSE	breeding
SH1	2010	2008-2015	FALSE	breeding
SH2	2010	2008-2015	FALSE	breeding
SH3	2010	2008-2015	FALSE	breeding
SHARP	1995	1992-1999	FALSE	breeding
SHELLY	2014	2008-2015	FALSE	breeding
SNOWSTAR	2005	2000-2007	FALSE	breeding
STEELE-ND	2001	2000-2007	FALSE	breeding
STOA	1992	1992-1999	FALSE	breeding
SURPASS	2014	2008-2015	FALSE	breeding
TOM	2004	2000-2007	FALSE	breeding
TRAVERSE	2004	2000-2007	FALSE	breeding
TRENTON	1992	1992-1999	FALSE	breeding
ULEN	2000	2000-2007	FALSE	breeding
VERDE	1993	1992-1999	TRUE	susceptible
VIDA	2019	2016-2024	FALSE	breeding
WALWORTH	1998	1992-1999	FALSE	breeding
WASKADA	2006	2000-2007	FALSE	breeding
WB9209	2010	2008-2015	FALSE	breeding
WHEATON	1992	1992-1999	TRUE	susceptible
X00009-16	2011	2008-2015	FALSE	breeding
XW397A3	1992	1992-1999	FALSE	breeding
XW398A4	1992	1992-1999	FALSE	breeding

## Sheet: Table S2 - Check Lines
Table S2. Check line phenotypic summary (17 checks, 8 resistant, 9 susceptible). Mean values across all nursery-years of testing.
sample_id	n_obs	year_min	year_max	year_span	n_locations	DIS_mean	VSK_mean	DON_mean	check_type
BRICK	11	2005	2013	9	5	13.7	9	2.59	resistant
ND2710	148	1996	2024	29	11	13.7	15.1	4.96	resistant
BOOST	87	2013	2023	11	15	17.4	11.5	4.07	resistant
ALSEN	64	1999	2024	26	6	20.9	9.6	5.3	resistant
BACUP	174	1995	2024	30	11	22.2	17.4	6.2	resistant
ROLLAG	74	2009	2024	16	18	25.4	20.1	6.23	resistant
LINKERT	93	2009	2023	15	18	27.5	18.2	7	resistant
MCVEY	29	1996	2003	8	8	27.6	21.3	9.76	resistant
2375	259	1995	2018	24	21	31.9	21.3	8.93	susceptible
KEENE	141	1993	2018	26	17	36	18.6	9.78	susceptible
MARQUIS	208	1992	2023	32	18	36.9	22.7	9.37	susceptible
CHRIS	208	1992	2023	32	18	38.1	28.4	12.14	susceptible
VERDE	140	1993	2018	26	17	38.8	21.9	9.78	susceptible
NORM	48	1997	2024	28	8	46.5	53.5	19.47	susceptible
WHEATON	194	1992	2024	33	11	57.6	54.1	20.11	susceptible
MN00269	62	2001	2024	24	2	58.7	33.6	11.53	susceptible
ROBLIN	64	1998	2024	27	3	64.1	47	10.78	susceptible

## Sheet: Table S3 - Era Validation
Table S3. Per-era validation detail: R², slope, p-value, and FDR-adjusted p-value for each block × trait × era combination (220 tests).
Era	trait	block_id	n_lines	r_squared	slope	p_value	validated	p_adj
1992-1999	DIS	b01209	95	0.0015	-1.2359	0.7117	FALSE	0.8896
1992-1999	DIS	b00559	95	0.0004	1.5994	0.8453	FALSE	0.9474
1992-1999	DIS	b01606	95	0.0199	6.0661	0.1726	FALSE	0.3836
1992-1999	DIS	b01460	95	0.0269	8.1226	0.1125	FALSE	0.3365
1992-1999	DIS	b00024	95	0.0239	8.6677	0.1346	FALSE	0.3365
1992-1999	DIS	b00788	95	0.0471	13.2936	0.03459	FALSE	0.2306
1992-1999	DIS	b00573	95	0.0067	5.1724	0.4292	FALSE	0.6886
1992-1999	DIS	b00698	95	0.0077	-5.3504	0.3978	FALSE	0.6886
1992-1999	DIS	b00266	95	0.0001	-0.496	0.9202	FALSE	0.9474
1992-1999	DIS	b01054	95	0.0499	13.883	0.02952	FALSE	0.2306
1992-1999	DIS	b00903	95	0.0026	3.8037	0.6239	FALSE	0.8319
1992-1999	DIS	b00654	95	0.016	5.9378	0.2224	FALSE	0.4448
1992-1999	DIS	b00104	95	0	-0.4899	0.9474	FALSE	0.9474
1992-1999	DIS	b00990	95	0.0538	15.3432	0.02369	FALSE	0.2306
1992-1999	DIS	b01307	95	0.0001	-0.6495	0.9338	FALSE	0.9474
1992-1999	DIS	b00434	95	0.0062	5.5909	0.4488	FALSE	0.6886
1992-1999	DIS	b01047	95	0.0357	13.671	0.06678	FALSE	0.2671
1992-1999	DIS	b00089	95	0.0401	13.9866	0.0516	FALSE	0.258
1992-1999	DIS	b01016	95	0.0053	5.645	0.482	FALSE	0.6886
1992-1999	DIS	b01602	95	0.024	10.7821	0.1337	FALSE	0.3365
1992-1999	VSK	b00559	71	0.0283	5.7849	0.1609	FALSE	0.4022
1992-1999	VSK	b00698	71	0.0007	-0.5144	0.829	FALSE	0.9296
1992-1999	VSK	b00654	71	0.0012	0.6239	0.7744	FALSE	0.9296
1992-1999	VSK	b01209	71	0.0005	0.4994	0.8493	FALSE	0.9296
1992-1999	VSK	b00582	71	0.0042	1.4168	0.5921	FALSE	0.8135
1992-1999	VSK	b01207	71	0.064	6.2329	0.03325	FALSE	0.2217
1992-1999	VSK	b01202	71	0.0453	5.5085	0.07482	FALSE	0.3633
1992-1999	VSK	b00872	71	0.0222	3.6855	0.2153	FALSE	0.4784
1992-1999	VSK	b01606	71	0.0003	-0.4891	0.8831	FALSE	0.9296
1992-1999	VSK	b01492	71	0.0881	7.8241	0.01196	FALSE	0.1928
1992-1999	VSK	b00024	71	0.0082	-2.6206	0.4535	FALSE	0.7368
1992-1999	VSK	b00876	71	0.0368	6.0258	0.109	FALSE	0.3633
1992-1999	VSK	b01170	71	0	0.1809	0.9618	FALSE	0.9618
1992-1999	VSK	b00260	71	0.0169	3.9299	0.2795	FALSE	0.559
1992-1999	VSK	b00512	71	0.0073	2.5886	0.4789	FALSE	0.7368
1992-1999	VSK	b01139	71	0.0382	6.3164	0.1022	FALSE	0.3633
1992-1999	VSK	b00036	71	0.0139	3.7674	0.3271	FALSE	0.5947
1992-1999	VSK	b01598	71	0.0305	-5.8213	0.1449	FALSE	0.4022
1992-1999	VSK	b01334	71	0.0038	2.116	0.6101	FALSE	0.8135
1992-1999	VSK	b01260	71	0.0768	9.5366	0.01928	FALSE	0.1928
2000-2007	DIS	b01209	129	0.0924	6.0933	0.0004624	TRUE	0.004624
2000-2007	DIS	b00559	129	0.1454	10.4433	8.237e-06	TRUE	0.0001647
2000-2007	DIS	b01606	129	0.0394	5.3206	0.02416	FALSE	0.1172
2000-2007	DIS	b01460	129	0.0059	2.4212	0.3881	FALSE	0.5999
2000-2007	DIS	b00024	129	0.003	2.0189	0.5348	FALSE	0.6292
2000-2007	DIS	b00788	129	0.0002	0.5853	0.8643	FALSE	0.8995
2000-2007	DIS	b00573	129	0.0529	8.9525	0.008725	FALSE	0.05817
2000-2007	DIS	b00698	129	0.004	2.4137	0.476	FALSE	0.5999
2000-2007	DIS	b00266	129	0.0043	2.1892	0.4578	FALSE	0.5999
2000-2007	DIS	b01054	129	0.0058	3.6072	0.3912	FALSE	0.5999
2000-2007	DIS	b00903	129	0.0368	7.875	0.02931	FALSE	0.1172
2000-2007	DIS	b00654	129	0.0039	2.6407	0.4799	FALSE	0.5999
2000-2007	DIS	b00104	129	0.03	-7.6467	0.0495	FALSE	0.1237
2000-2007	DIS	b00990	129	0.0001	0.4678	0.8995	FALSE	0.8995
2000-2007	DIS	b01307	129	0.0162	6.0275	0.1511	FALSE	0.3022
2000-2007	DIS	b00434	129	0.0344	8.5476	0.03532	FALSE	0.1177
2000-2007	DIS	b01047	129	0.0127	5.2371	0.2033	FALSE	0.3696
2000-2007	DIS	b00089	129	0.0003	0.8697	0.8381	FALSE	0.8995
2000-2007	DIS	b01016	129	0.0254	7.5982	0.07143	FALSE	0.1587
2000-2007	DIS	b01602	129	0.0312	-7.9569	0.04509	FALSE	0.1237
2000-2007	VSK	b00559	129	0.095	5.839	0.0003808	TRUE	0.003973
2000-2007	VSK	b00698	129	0.0035	1.0207	0.5032	FALSE	0.7189
2000-2007	VSK	b00654	129	0.0286	3.5153	0.05542	FALSE	0.246
2000-2007	VSK	b01209	129	0.0069	1.8141	0.3493	FALSE	0.6351
2000-2007	VSK	b00582	129	0.0004	0.4255	0.8115	FALSE	0.9017
2000-2007	VSK	b01207	129	0.0158	2.8734	0.1555	FALSE	0.4443
2000-2007	VSK	b01202	129	0.0044	1.585	0.4572	FALSE	0.7034
2000-2007	VSK	b00872	129	0.0944	8.014	0.0003973	TRUE	0.003973
2000-2007	VSK	b01606	129	0.0273	3.979	0.06151	FALSE	0.246
2000-2007	VSK	b01492	129	0.0017	1.0513	0.647	FALSE	0.8087
2000-2007	VSK	b00024	129	0.0095	2.4531	0.2716	FALSE	0.552
2000-2007	VSK	b00876	129	0.0203	4.1672	0.1073	FALSE	0.3577
2000-2007	VSK	b01170	129	0	-0.139	0.9539	FALSE	0.9539
2000-2007	VSK	b00260	129	0.0129	2.9176	0.1998	FALSE	0.4995
2000-2007	VSK	b00512	129	0.0019	1.3437	0.6274	FALSE	0.8087
2000-2007	VSK	b01139	129	0.0658	7.3756	0.003337	TRUE	0.02225
2000-2007	VSK	b00036	129	0.0093	-3.0363	0.276	FALSE	0.552
2000-2007	VSK	b01598	129	0.0011	0.9606	0.7108	FALSE	0.8362
2000-2007	VSK	b01334	129	0.0001	0.3265	0.9025	FALSE	0.95
2000-2007	VSK	b01260	129	0.0057	-2.4277	0.3934	FALSE	0.6557
2000-2007	DON	b01209	109	0.0584	6.5342	0.01135	FALSE	0.05675
2000-2007	DON	b00559	109	0.0623	11.4489	0.00886	FALSE	0.05675
2000-2007	DON	b00698	109	0.0056	4.7787	0.4412	FALSE	0.5883
2000-2007	DON	b00582	109	0.0302	11.3714	0.07067	FALSE	0.1784
2000-2007	DON	b00260	109	0.0006	1.5951	0.7996	FALSE	0.8349
2000-2007	DON	b00455	109	0.0343	12.2633	0.05373	FALSE	0.1784
2000-2007	DON	b00036	109	0.0026	3.7258	0.6003	FALSE	0.667
2000-2007	DON	b00903	109	0.0208	10.3977	0.1342	FALSE	0.244
2000-2007	DON	b00788	109	0.0185	10.1601	0.1587	FALSE	0.2645
2000-2007	DON	b01346	109	0.0033	4.0422	0.5538	FALSE	0.667
2000-2007	DON	b01334	109	0.0123	8.5404	0.2501	FALSE	0.3573
2000-2007	DON	b01489	109	0.0301	14.8027	0.07137	FALSE	0.1784
2000-2007	DON	b00573	109	0.0863	24.5112	0.001933	TRUE	0.0218
2000-2007	DON	b00039	109	0.003	4.8053	0.5692	FALSE	0.667
2000-2007	DON	b01293	109	0.0004	1.6913	0.8349	FALSE	0.8349
2000-2007	DON	b01403	109	0.0136	10.1039	0.2277	FALSE	0.3503
2000-2007	DON	b00315	109	0.022	14.0123	0.1238	FALSE	0.244
2000-2007	DON	b01438	109	0.032	17.96	0.06287	FALSE	0.1784
2000-2007	DON	b00872	109	0.0248	15.449	0.1021	FALSE	0.2269
2000-2007	DON	b00562	109	0.0844	27.9556	0.00218	TRUE	0.0218
2008-2015	DIS	b01209	174	0.0316	3.2183	0.01901	TRUE	0.04752
2008-2015	DIS	b00559	174	0.0979	6.7784	2.639e-05	TRUE	0.0005278
2008-2015	DIS	b01606	174	0.0078	-2.1544	0.2464	FALSE	0.352
2008-2015	DIS	b01460	174	0.0023	-1.3659	0.5277	FALSE	0.6166
2008-2015	DIS	b00024	174	0.0166	4.1223	0.09067	FALSE	0.1649
2008-2015	DIS	b00788	174	0.0004	-0.6905	0.7917	FALSE	0.7917
2008-2015	DIS	b00573	174	0.0456	7.3183	0.004689	TRUE	0.01345
2008-2015	DIS	b00698	174	0.0455	7.3766	0.004708	TRUE	0.01345
2008-2015	DIS	b00266	174	0.0299	6.7922	0.02244	TRUE	0.04987
2008-2015	DIS	b01054	174	0.084	10.0895	0.0001045	TRUE	0.001045
2008-2015	DIS	b00903	174	0.0554	7.8656	0.001771	TRUE	0.008568
2008-2015	DIS	b00654	174	0.0009	-1.2589	0.7004	FALSE	0.7373
2008-2015	DIS	b00104	174	0.0283	-6.2317	0.02643	FALSE	0.05286
2008-2015	DIS	b00990	174	0.0036	2.27	0.4314	FALSE	0.5752
2008-2015	DIS	b01307	174	0.0631	9.7029	0.000825	TRUE	0.0055
2008-2015	DIS	b00434	174	0.002	1.7774	0.5549	FALSE	0.6166
2008-2015	DIS	b01047	174	0.0149	5.1433	0.1092	FALSE	0.1751
2008-2015	DIS	b00089	174	0.0145	5.1067	0.1138	FALSE	0.1751
2008-2015	DIS	b01016	174	0.0535	9.76	0.002142	TRUE	0.008568
2008-2015	DIS	b01602	174	0.0028	-2.7065	0.4855	FALSE	0.6069
2008-2015	VSK	b00559	173	0.026	3.1844	0.03401	FALSE	0.1134
2008-2015	VSK	b00698	173	0.0442	4.3197	0.005512	TRUE	0.03615
2008-2015	VSK	b00654	173	0.0069	2.2914	0.2782	FALSE	0.3709
2008-2015	VSK	b01209	173	0.0019	1.0857	0.5723	FALSE	0.6024
2008-2015	VSK	b00582	173	0.0013	-0.9289	0.6327	FALSE	0.6327
2008-2015	VSK	b01207	173	0.0395	5.2596	0.008729	TRUE	0.03615
2008-2015	VSK	b01202	173	0.0029	1.4532	0.4846	FALSE	0.5384
2008-2015	VSK	b00872	173	0.0096	2.7182	0.2004	FALSE	0.3083
2008-2015	VSK	b01606	173	0.0085	-2.6747	0.2274	FALSE	0.3249
2008-2015	VSK	b01492	173	0.0392	6.0449	0.009037	TRUE	0.03615
2008-2015	VSK	b00024	173	0.0208	4.3569	0.05824	FALSE	0.1519
2008-2015	VSK	b00876	173	0.0035	2.141	0.4426	FALSE	0.5207
2008-2015	VSK	b01170	173	0.0132	3.6743	0.1316	FALSE	0.2591
2008-2015	VSK	b00260	173	0.0545	7.7334	0.002002	TRUE	0.02002
2008-2015	VSK	b00512	173	0.0204	4.6342	0.06074	FALSE	0.1519
2008-2015	VSK	b01139	173	0.0125	3.9174	0.1425	FALSE	0.2591
2008-2015	VSK	b00036	173	0.0576	8.6462	0.001468	TRUE	0.02002
2008-2015	VSK	b01598	173	0.0059	-2.65	0.3136	FALSE	0.392
2008-2015	VSK	b01334	173	0.0111	3.6967	0.1676	FALSE	0.2793
2008-2015	VSK	b01260	173	0.0127	4.0334	0.1398	FALSE	0.2591
2008-2015	DON	b01209	168	0.0286	2.3575	0.02853	FALSE	0.05706
2008-2015	DON	b00559	168	0.0944	6.5312	5.078e-05	TRUE	0.001016
2008-2015	DON	b00698	168	0.0515	7.4783	0.003095	TRUE	0.01547
2008-2015	DON	b00582	168	0.0055	2.5208	0.3405	FALSE	0.4256
2008-2015	DON	b00260	168	0.0132	4.0902	0.1383	FALSE	0.1976
2008-2015	DON	b00455	168	0.0464	7.3654	0.005033	TRUE	0.02013
2008-2015	DON	b00036	168	0.0153	4.5503	0.1105	FALSE	0.17
2008-2015	DON	b00903	168	0.0843	9.6566	0.0001342	TRUE	0.001342
2008-2015	DON	b00788	168	0.0028	-1.9863	0.4949	FALSE	0.5822
2008-2015	DON	b01346	168	0.0002	-0.4625	0.8743	FALSE	0.8743
2008-2015	DON	b01334	168	0.0271	6.2625	0.03296	FALSE	0.05993
2008-2015	DON	b01489	168	0.0086	3.7451	0.2325	FALSE	0.31
2008-2015	DON	b00573	168	0.0242	6.435	0.04423	FALSE	0.07372
2008-2015	DON	b00039	168	0.0009	1.2	0.7056	FALSE	0.7427
2008-2015	DON	b01293	168	0.0315	7.6889	0.02127	FALSE	0.05318
2008-2015	DON	b01403	168	0.0302	7.7493	0.02427	FALSE	0.05393
2008-2015	DON	b00315	168	0.0606	11.2308	0.001298	TRUE	0.008653
2008-2015	DON	b01438	168	0.0376	8.9946	0.01182	TRUE	0.03377
2008-2015	DON	b00872	168	0.0013	-1.648	0.647	FALSE	0.7189
2008-2015	DON	b00562	168	0.0398	9.629	0.00956	TRUE	0.03187
2016-2024	DIS	b01209	283	0.0259	2.8834	0.006669	TRUE	0.01495
2016-2024	DIS	b00559	283	0.0542	4.888	7.7e-05	TRUE	0.000385
2016-2024	DIS	b01606	283	0.0002	0.3042	0.8324	FALSE	0.8818
2016-2024	DIS	b01460	283	0	-0.1301	0.9373	FALSE	0.9373
2016-2024	DIS	b00024	283	0.0013	1.1432	0.551	FALSE	0.6887
2016-2024	DIS	b00788	283	0.0172	-4.4356	0.02728	TRUE	0.0496
2016-2024	DIS	b00573	283	0.0445	6.8495	0.0003509	TRUE	0.00117
2016-2024	DIS	b00698	283	0.0001	0.4218	0.8377	FALSE	0.8818
2016-2024	DIS	b00266	283	0.0004	0.9304	0.7299	FALSE	0.8587
2016-2024	DIS	b01054	283	0.0484	7.6868	0.00019	TRUE	0.00076
2016-2024	DIS	b00903	283	0.0319	6.8194	0.002578	TRUE	0.007366
2016-2024	DIS	b00654	283	0.144	19.5739	4.017e-11	TRUE	8.034e-10
2016-2024	DIS	b00104	283	0.0258	-5.7903	0.006727	TRUE	0.01495
2016-2024	DIS	b00990	283	0.0017	-1.5999	0.4845	FALSE	0.646
2016-2024	DIS	b01307	283	0.0666	9.6044	1.102e-05	TRUE	0.0001079
2016-2024	DIS	b00434	283	0.0044	-2.947	0.2653	FALSE	0.379
2016-2024	DIS	b01047	283	0.005	2.9636	0.2336	FALSE	0.3594
2016-2024	DIS	b00089	283	0.0641	11.0051	1.619e-05	TRUE	0.0001079
2016-2024	DIS	b01016	283	0.0075	3.6476	0.1461	FALSE	0.2435
2016-2024	DIS	b01602	283	0.0192	5.9613	0.01968	TRUE	0.03936
2016-2024	VSK	b00559	276	0.0677	6.357	1.197e-05	TRUE	4.788e-05
2016-2024	VSK	b00698	276	0.0011	0.8491	0.5898	FALSE	0.7216
2016-2024	VSK	b00654	276	0.1558	17.9201	1.001e-11	TRUE	1.001e-10
2016-2024	VSK	b01209	276	0.0132	3.5655	0.05653	FALSE	0.08697
2016-2024	VSK	b00582	276	0.0003	0.6368	0.7587	FALSE	0.843
2016-2024	VSK	b01207	276	0.0282	5.1544	0.005188	TRUE	0.01297
2016-2024	VSK	b01202	276	0.0155	4.4553	0.03874	FALSE	0.06457
2016-2024	VSK	b00872	276	0.0297	5.9636	0.004066	TRUE	0.01162
2016-2024	VSK	b01606	276	0.002	1.6036	0.4641	FALSE	0.6489
2016-2024	VSK	b01492	276	0.0971	11.6222	1.247e-07	TRUE	8.313e-07
2016-2024	VSK	b00024	276	0	0.0807	0.972	FALSE	0.972
2016-2024	VSK	b00876	276	0.068	9.6928	1.149e-05	TRUE	4.788e-05
2016-2024	VSK	b01170	276	0.017	5.2483	0.03011	FALSE	0.05993
2016-2024	VSK	b00260	276	0.0214	6.6822	0.01505	TRUE	0.03344
2016-2024	VSK	b00512	276	0.0165	5.3442	0.03296	FALSE	0.05993
2016-2024	VSK	b01139	276	0.0573	10.4416	5.879e-05	TRUE	0.000196
2016-2024	VSK	b00036	276	0.2179	19.9283	2.411e-16	TRUE	4.822e-15
2016-2024	VSK	b01598	276	0.0018	1.8642	0.4867	FALSE	0.6489
2016-2024	VSK	b01334	276	0.0009	1.3707	0.6134	FALSE	0.7216
2016-2024	VSK	b01260	276	0.0001	0.3482	0.8976	FALSE	0.9448
2016-2024	DON	b01209	266	0.0124	2.0407	0.07021	FALSE	0.108
2016-2024	DON	b00559	266	0.0506	6.2385	0.0002165	TRUE	0.001443
2016-2024	DON	b00698	266	0.006	3.4433	0.2061	FALSE	0.2944
2016-2024	DON	b00582	266	0	-0.3358	0.9144	FALSE	0.9144
2016-2024	DON	b00260	266	0.0274	8.5819	0.006775	TRUE	0.01694
2016-2024	DON	b00455	266	0.0199	6.5375	0.02147	TRUE	0.04294
2016-2024	DON	b00036	266	0.205	21.0944	7.499e-15	TRUE	1.5e-13
2016-2024	DON	b00903	266	0.0365	9.6911	0.001742	TRUE	0.006968
2016-2024	DON	b00788	266	0.0025	2.5191	0.4148	FALSE	0.488
2016-2024	DON	b01346	266	0.0004	1.0073	0.7601	FALSE	0.8001
2016-2024	DON	b01334	266	0.0012	1.7814	0.5761	FALSE	0.6401
2016-2024	DON	b01489	266	0.0145	5.8047	0.0499	FALSE	0.08317
2016-2024	DON	b00573	266	0.0255	8.4781	0.00908	TRUE	0.02018
2016-2024	DON	b00039	266	0.1396	20.6746	3.084e-10	TRUE	3.084e-09
2016-2024	DON	b01293	266	0.0046	3.8066	0.2693	FALSE	0.3366
2016-2024	DON	b01403	266	0.0333	11.3615	0.002805	TRUE	0.00935
2016-2024	DON	b00315	266	0.0314	10.2085	0.003755	TRUE	0.01073
2016-2024	DON	b01438	266	0.0048	4.078	0.2578	FALSE	0.3366
2016-2024	DON	b00872	266	0.0398	12.1953	0.001076	TRUE	0.00538
2016-2024	DON	b00562	266	0.0192	8.4193	0.02388	TRUE	0.04342

## Sheet: Table S4 - Stability
Table S4. Stability classification of haplotype blocks with supporting metrics (eras validated, effect direction consistency, mean R² across eras).
trait	block_id	chr	start_Mb	n_eras_validated	category	mean_r2	direction_consistent
DIS	b00559	Chr3B	12.4	3	Stable	0.0745	TRUE
DIS	b01209	Chr6A	240.3	3	Stable	0.0378	FALSE
DIS	b01054	Chr5B	548.89	2	Era-specific	0.047	TRUE
DIS	b00573	Chr3B	52.43	2	Era-specific	0.0374	TRUE
DIS	b01307	Chr6B	676.59	2	Era-specific	0.0365	FALSE
DIS	b00903	Chr5A	50.28	2	Era-specific	0.0317	TRUE
DIS	b00654	Chr3D	29.91	1	Era-specific	0.0412	FALSE
DIS	b00089	Chr1A	592.86	1	Era-specific	0.0298	TRUE
DIS	b01016	Chr5B	46.49	1	Era-specific	0.0229	TRUE
DIS	b00104	Chr1B	10.1	1	Era-specific	0.0211	TRUE
DIS	b01602	Chr7D	89.81	1	Era-specific	0.0193	FALSE
DIS	b00788	Chr4B	15.16	1	Era-specific	0.0162	FALSE
DIS	b00698	Chr4A	590.09	1	Era-specific	0.0143	FALSE
DIS	b00266	Chr2A	244.59	1	Era-specific	0.0087	FALSE
DIS	b01047	Chr5B	539.64	0	Unvalidated	0.0171	TRUE
DIS	b01606	Chr7D	104.45	0	Unvalidated	0.0168	FALSE
DIS	b00990	Chr5A	709.87	0	Unvalidated	0.0148	FALSE
DIS	b00434	Chr2D	207.19	0	Unvalidated	0.0118	FALSE
DIS	b00024	Chr1A	22.81	0	Unvalidated	0.0112	TRUE
DIS	b01460	Chr7A	686.36	0	Unvalidated	0.0088	FALSE
DON	b00562	Chr3B	23.5	3	Stable	0.0478	TRUE
DON	b00559	Chr3B	12.4	2	Era-specific	0.0691	TRUE
DON	b00903	Chr5A	50.28	2	Era-specific	0.0472	TRUE
DON	b00573	Chr3B	52.43	2	Era-specific	0.0453	TRUE
DON	b00315	Chr2B	20.19	2	Era-specific	0.038	TRUE
DON	b00455	Chr3A	11.93	2	Era-specific	0.0335	TRUE
DON	b00036	Chr1A	44.02	1	Era-specific	0.0743	TRUE
DON	b00039	Chr1A	344.95	1	Era-specific	0.0478	TRUE
DON	b01403	Chr7A	56.93	1	Era-specific	0.0257	TRUE
DON	b01438	Chr7A	643.53	1	Era-specific	0.0248	TRUE
DON	b00872	Chr4D	455.54	1	Era-specific	0.0219	FALSE
DON	b00698	Chr4A	590.09	1	Era-specific	0.021	TRUE
DON	b00260	Chr2A	81.97	1	Era-specific	0.0137	TRUE
DON	b01209	Chr6A	240.3	0	Unvalidated	0.0331	TRUE
DON	b01489	Chr7A	738.26	0	Unvalidated	0.0177	TRUE
DON	b01334	Chr6B	717.46	0	Unvalidated	0.0135	TRUE
DON	b01293	Chr6B	265.05	0	Unvalidated	0.0122	TRUE
DON	b00582	Chr3B	491.46	0	Unvalidated	0.0119	FALSE
DON	b00788	Chr4B	15.16	0	Unvalidated	0.0079	FALSE
DON	b01346	Chr6D	6.75	0	Unvalidated	0.0013	FALSE
VSK	b00036	Chr1A	44.02	2	Era-specific	0.0747	FALSE
VSK	b01492	Chr7A	744.34	2	Era-specific	0.0565	TRUE
VSK	b00559	Chr3B	12.4	2	Era-specific	0.0542	TRUE
VSK	b01139	Chr5D	44.82	2	Era-specific	0.0435	TRUE
VSK	b00872	Chr4D	455.54	2	Era-specific	0.039	TRUE
VSK	b01207	Chr6A	68.36	2	Era-specific	0.0369	TRUE
VSK	b00260	Chr2A	81.97	2	Era-specific	0.0264	TRUE
VSK	b00654	Chr3D	29.91	1	Era-specific	0.0481	TRUE
VSK	b00876	Chr4D	512.27	1	Era-specific	0.0321	TRUE
VSK	b00698	Chr4A	590.09	1	Era-specific	0.0124	FALSE
VSK	b01260	Chr6B	29.27	0	Unvalidated	0.0238	FALSE
VSK	b01202	Chr6A	35.65	0	Unvalidated	0.017	TRUE
VSK	b00512	Chr3A	686.67	0	Unvalidated	0.0115	TRUE
VSK	b01598	Chr7D	59.75	0	Unvalidated	0.0098	FALSE
VSK	b00024	Chr1A	22.81	0	Unvalidated	0.0096	FALSE
VSK	b01606	Chr7D	104.45	0	Unvalidated	0.0095	FALSE
VSK	b01170	Chr5D	547.28	0	Unvalidated	0.0076	FALSE
VSK	b01209	Chr6A	240.3	0	Unvalidated	0.0056	TRUE
VSK	b01334	Chr6B	717.46	0	Unvalidated	0.004	TRUE
VSK	b00582	Chr3B	491.46	0	Unvalidated	0.0016	FALSE

## Sheet: Table S5 - GWAS Comparison
Table S5. Block-centric comparison of haplotype framework vs. single-marker GWAS. Top 20 blocks per trait ranked by local GEBV variance. GWAS-supported = at least one marker within block reached suggestive threshold (-log10(p) >= 4.0).
trait	rank	block_id	chr	start_Mb	end_Mb	n_markers	local_var	block_R2	block_p	block_p_adj	block_sig	best_gwas_logp	best_gwas_marker	n_markers_in_gwas	gwas_support
DIS	1	b01209	Chr6A	240.3	434.78	12	0.4431	0.0254	2.39e-05	5.97e-05	TRUE	1.57	Chr6A_338283312	12	FALSE
DON	1	b01209	Chr6A	240.3	434.78	12	0.0657	0.0222	0.000328	0.000729	TRUE	1.32	Chr6A_338283312	12	FALSE
VSK	4	b01209	Chr6A	240.3	434.78	12	0.1295	0.0094	0.0125	0.0193	TRUE	2.16	Chr6A_259285313	12	FALSE
DIS	9	b00266	Chr2A	244.59	507.89	8	0.1179	0.01	0.00839	0.014	TRUE	0.84	Chr2A_410906397	8	FALSE
DIS	12	b00654	Chr3D	29.91	41.66	8	0.1018	0.0481	5.01e-09	3.34e-08	TRUE	1.69	Chr3D_36283430	8	FALSE
VSK	3	b00654	Chr3D	29.91	41.66	8	0.1324	0.0397	2.27e-07	7.58e-07	TRUE	1.19	Chr3D_30959492	8	FALSE
VSK	13	b01170	Chr5D	547.28	550.85	8	0.0766	0.0129	0.00344	0.00687	TRUE	0.48	Chr5D_550258706	8	FALSE
DON	12	b01489	Chr7A	738.26	743.19	7	0.0079	0.0106	0.0132	0.0176	TRUE	1.36	Chr7A_741231386	7	FALSE
DON	4	b00582	Chr3B	491.46	567.47	6	0.0109	0.0078	0.0338	0.0398	TRUE	2.18	Chr3B_491461855	6	FALSE
VSK	5	b00582	Chr3B	491.46	567.47	6	0.1261	0.0026	0.193	0.227	FALSE	0.9	Chr3B_493853109	6	FALSE
DIS	4	b01460	Chr7A	686.36	689.7	5	0.1811	0.0011	0.389	0.432	FALSE	1.05	Chr7A_688215754	5	FALSE
DIS	10	b01054	Chr5B	548.89	549.58	5	0.1111	0.0485	4.35e-09	3.34e-08	TRUE	0.94	Chr5B_548893502	5	FALSE
DIS	13	b00104	Chr1B	10.1	10.46	5	0.1009	0.016	0.000834	0.00167	TRUE	2.17	Chr1B_10205198	5	FALSE
DON	5	b00260	Chr2A	81.97	86.88	5	0.0107	0.0177	0.00136	0.00248	TRUE	1.12	Chr2A_81973464	5	FALSE
DON	6	b00455	Chr3A	11.93	12.44	5	0.0106	0.0216	0.000397	0.000794	TRUE	1.72	Chr3A_12436801	5	FALSE
DON	7	b00036	Chr1A	44.02	51.8	5	0.0098	0.0579	4.6e-09	4.6e-08	TRUE	1.21	Chr1A_51652943	5	FALSE
VSK	7	b01202	Chr6A	35.65	37.82	5	0.1018	0.0096	0.0116	0.0193	TRUE	0.72	Chr6A_36799227	5	FALSE
VSK	14	b00260	Chr2A	81.97	86.88	5	0.0763	0.0158	0.00117	0.00259	TRUE	0.52	Chr2A_81973464	5	FALSE
VSK	17	b00036	Chr1A	44.02	51.8	5	0.0652	0.0698	4.56e-12	9.13e-11	TRUE	0.98	Chr1A_51652943	5	FALSE
DIS	5	b00024	Chr1A	22.81	24.59	4	0.1387	0.0082	0.0172	0.0264	TRUE	2.44	Chr1A_22811790	4	FALSE
DIS	7	b00573	Chr3B	52.43	53.88	4	0.1246	0.0266	1.54e-05	5.13e-05	TRUE	0.82	Chr3B_53817474	4	FALSE
DIS	8	b00698	Chr4A	590.09	592.17	4	0.1205	0.0007	0.489	0.492	FALSE	1.22	Chr4A_590091336	4	FALSE
DIS	15	b01307	Chr6B	676.59	682.79	4	0.0923	0.0259	1.99e-05	5.69e-05	TRUE	0.84	Chr6B_677356472	4	FALSE
DIS	20	b01602	Chr7D	89.81	92.41	4	0.0772	0.0024	0.196	0.261	FALSE	1.33	Chr7D_92414355	4	FALSE
DON	3	b00698	Chr4A	590.09	592.17	4	0.0118	0.0082	0.0295	0.0369	TRUE	1.18	Chr4A_590545782	4	FALSE
DON	10	b01346	Chr6D	6.75	6.92	4	0.0088	0.0002	0.73	0.73	FALSE	1.44	Chr6D_6849389	4	FALSE
DON	13	b00573	Chr3B	52.43	53.88	4	0.0075	0.0307	2.29e-05	6.56e-05	TRUE	0.73	Chr3B_53875497	4	FALSE
DON	17	b00315	Chr2B	20.19	23.75	4	0.0063	0.032	1.53e-05	5.12e-05	TRUE	0.47	Chr2B_21337577	4	FALSE
VSK	2	b00698	Chr4A	590.09	592.17	4	0.187	0.0048	0.0736	0.105	FALSE	1.5	Chr4A_590545782	4	FALSE
VSK	11	b00024	Chr1A	22.81	24.59	4	0.0879	0.004	0.103	0.138	FALSE	1.16	Chr1A_22931980	4	FALSE
VSK	15	b00512	Chr3A	686.67	686.88	4	0.0705	0.0098	0.0107	0.0193	TRUE	1.74	Chr3A_686869916	4	FALSE
VSK	18	b01598	Chr7D	59.75	60.82	4	0.0639	0.0001	0.83	0.83	FALSE	1.27	Chr7D_60551528	4	FALSE
VSK	20	b01260	Chr6B	29.27	29.98	4	0.0601	0.0034	0.135	0.169	FALSE	0.65	Chr6B_29978650	4	FALSE
DIS	2	b00559	Chr3B	12.4	13.96	3	0.2909	0.077	9.15e-14	1.83e-12	TRUE	2.02	Chr3B_13756335	3	FALSE
DIS	3	b01606	Chr7D	104.45	106.56	3	0.247	0.0076	0.0213	0.0304	TRUE	2.43	Chr7D_104446513	3	FALSE
DIS	6	b00788	Chr4B	15.16	15.85	3	0.1254	0.002	0.237	0.296	FALSE	1.78	Chr4B_15166187	3	FALSE
DIS	11	b00903	Chr5A	50.28	106.93	3	0.1062	0.0303	3.85e-06	1.54e-05	TRUE	1.79	Chr5A_106928114	3	FALSE
DIS	14	b00990	Chr5A	709.87	710.04	3	0.0989	0.0013	0.348	0.41	FALSE	1.99	Chr5A_709869465	3	FALSE
DIS	16	b00434	Chr2D	207.19	353.9	3	0.0827	0.0007	0.492	0.492	FALSE	2.33	Chr2D_207194942	3	FALSE
DIS	19	b01016	Chr5B	46.49	49.8	3	0.0786	0.0136	0.00203	0.00369	TRUE	1.41	Chr5B_46488184	3	FALSE
DON	2	b00559	Chr3B	12.4	13.96	3	0.0268	0.0623	1.18e-09	2.37e-08	TRUE	2.88	Chr3B_12400000	3	FALSE
DON	8	b00903	Chr5A	50.28	106.93	3	0.0097	0.0405	1.08e-06	7.18e-06	TRUE	2.64	Chr5A_50280848	3	FALSE
DON	9	b00788	Chr4B	15.16	15.85	3	0.0092	0.0025	0.229	0.241	FALSE	1.63	Chr4B_15162365	3	FALSE
DON	11	b01334	Chr6B	717.46	718.98	3	0.0086	0.0115	0.00992	0.0142	TRUE	1.87	Chr6B_718539859	3	FALSE
DON	15	b01293	Chr6B	265.05	399.06	3	0.0071	0.0075	0.0371	0.0412	TRUE	1.23	Chr6B_265047629	3	FALSE
DON	16	b01403	Chr7A	56.93	57.96	3	0.0064	0.0242	0.000174	0.000435	TRUE	0.99	Chr7A_56927881	3	FALSE
DON	19	b00872	Chr4D	455.54	456.71	3	0.0059	0.0172	0.00159	0.00264	TRUE	1.8	Chr4D_456708840	3	FALSE
VSK	1	b00559	Chr3B	12.4	13.96	3	0.191	0.0376	4.77e-07	1.36e-06	TRUE	1.76	Chr3B_12400000	3	FALSE
VSK	6	b01207	Chr6A	68.36	74.32	3	0.1225	0.043	6.99e-08	2.8e-07	TRUE	1.03	Chr6A_74324182	3	FALSE
VSK	8	b00872	Chr4D	455.54	456.71	3	0.1004	0.032	3.55e-06	8.89e-06	TRUE	1.59	Chr4D_456708840	3	FALSE
VSK	9	b01606	Chr7D	104.45	106.56	3	0.0964	0.002	0.255	0.269	FALSE	1.59	Chr7D_104446513	3	FALSE
VSK	16	b01139	Chr5D	44.82	47.35	3	0.0668	0.0433	6.34e-08	2.8e-07	TRUE	0.49	Chr5D_47351018	3	FALSE
VSK	19	b01334	Chr6B	717.46	718.98	3	0.0628	0.0024	0.207	0.23	FALSE	1.18	Chr6B_718977835	3	FALSE
DIS	17	b01047	Chr5B	539.64	539.75	2	0.0817	0.0167	0.000625	0.00139	TRUE	1.35	Chr5B_539754924	2	FALSE
DIS	18	b00089	Chr1A	592.86	593.46	2	0.0798	0.0334	1.22e-06	6.1e-06	TRUE	2.23	Chr1A_593463298	2	FALSE
DON	14	b00039	Chr1A	344.95	358.63	2	0.0071	0.0363	4.01e-06	2.01e-05	TRUE	1.84	Chr1A_344952043	2	FALSE
DON	18	b01438	Chr7A	643.53	644.64	2	0.0061	0.0162	0.00214	0.0033	TRUE	1.5	Chr7A_644641719	2	FALSE
DON	20	b00562	Chr3B	23.5	23.54	2	0.0058	0.0332	1.05e-05	4.19e-05	TRUE	1.32	Chr3B_23535370	2	FALSE
VSK	10	b01492	Chr7A	744.34	744.34	2	0.0891	0.0456	2.76e-08	1.84e-07	TRUE	1.62	Chr7A_744336883	2	FALSE
VSK	12	b00876	Chr4D	512.27	512.27	1	0.0782	0.0578	3.49e-10	3.49e-09	TRUE	4.7	Chr4D_512274808	1	TRUE

## Sheet: Table S6 - GWAS Sig. Hits
Table S6. GWAS-significant and suggestive associations for DIS and VSK (Bonferroni and suggestive thresholds).
marker	chr_num	pos	neglogp	chr	p_value	sig_bonf	sig_suggestive	trait
Chr1D_210272416	15	210272416	6.25833	Chr1D	5.51663e-07	TRUE	TRUE	DIS
Chr1A_422264751	1	422264751	5.83466	Chr1A	1.46333e-06	TRUE	TRUE	DIS
Chr2A_55930787	2	55930787	5.52997	Chr2A	2.95138e-06	TRUE	TRUE	DIS
Chr5D_523569892	19	523569892	5.45857	Chr5D	3.47879e-06	TRUE	TRUE	DIS
Chr3A_30978356	3	30978356	4.41751	Chr3A	3.82377e-05	FALSE	TRUE	DIS
Chr1D_210272416	15	210272416	10.9004	Chr1D	1.25771e-11	TRUE	TRUE	VSK
Chr1A_422264751	1	422264751	10.7136	Chr1A	1.93366e-11	TRUE	TRUE	VSK
Chr3A_30978356	3	30978356	9.88145	Chr3A	1.31386e-10	TRUE	TRUE	VSK
Chr2A_55930787	2	55930787	9.13439	Chr2A	7.33856e-10	TRUE	TRUE	VSK
Chr5D_523569892	19	523569892	6.14379	Chr5D	7.18149e-07	TRUE	TRUE	VSK
Chr4D_512274808	18	512274808	4.70058	Chr4D	1.9926e-05	TRUE	TRUE	VSK
Chr5B_175588772	12	175588772	4.33122	Chr5B	4.66428e-05	FALSE	TRUE	VSK

## Sheet: Table S7 - Haplotype Classes
Table S7. Directional selection response at 35 validated FHB resistance haplotype blocks. Position gives the block span on the indicated chromosome; n SNPs is the number of markers defining the block (see Methods). Logistic regression of binary resistance haplotype classification on breeding era (1–4) yields P (era) and R²; logistic regression on entry year as a continuous variable yields P (year…
Block	Chr	Position (Mb)	n SNPs	Trait	Freq Era1	Freq Era4	Δ freq	P (era)	R²	P (year)	Slope (year)	Haps (R/S)ᵃ	Category
b00266	Chr2A	244.6–507.9	8	DIS	0.537	0.887	0.35	9.41e-13	0.01	1.35e-12	0.073	5 (1R/4S) [total: 21]	Positive selection
b00559	Chr3B	12.4–14.0	3	DIS	0.074	0.475	0.402	6.66e-12	0.077	5.79e-12	0.0668	8 (8R/0S) [total: 13]	Positive selection
b00654	Chr3D	29.9–41.7	8	DIS	0.621	0.926	0.305	2.54e-10	0.0481	1.91e-11	0.0769	4 (1R/3S) [total: 20]	Positive selection
b00260	Chr2A	82.0–86.9	5	DON	0.242	0.623	0.381	5.24e-10	0.0177	3.94e-10	0.0549	10 (2R/8S) [total: 31]	Positive selection
b00562	Chr3B	23.5–23.5	2	DON	0.232	0.542	0.311	2e-09	0.0332	1.37e-10	0.0591	6 (6R/0S) [total: 8]	Positive selection
b01209	Chr6A	240.3–434.8	12	DIS	0.326	0.616	0.29	3.15e-07	0.0254	1.76e-07	0.0447	9 (5R/4S) [total: 52]	Positive selection
b00024	Chr1A	22.8–24.6	4	DIS	0.474	0.623	0.15	0.0019	0.0082	0.0009	0.0276	8 (1R/7S) [total: 18]	Positive selection
b01489	Chr7A	738.3–743.2	7	DON	0.179	0.306	0.127	0.002	0.0106	7.68e-05	0.0407	6 (6R/0S) [total: 19]	Positive selection
b01606	Chr7D	104.5–106.6	3	DIS	0.358	0.546	0.188	0.0042	0.0076	0.0052	0.0232	5 (1R/4S) [total: 14]	Positive selection
b00315	Chr2B	20.2–23.8	4	DON	0.4	0.553	0.153	0.0084	0.032	0.0083	0.0219	10 (9R/1S) [total: 21]	Positive selection
b00104	Chr1B	10.1–10.5	5	DIS	0.463	0.563	0.1	0.0394	0.016	0.0626	0.0154	9 (1R/8S) [total: 42]	Positive selection
b01492	Chr7A	744.3	2	VSK	0.579	0.69	0.111	0.0403	0.0456	0.0291	0.0187	6 (1R/5S) [total: 7]	Positive selection
b01403	Chr7A	56.9–58.0	3	DON	0.642	0.373	-0.269	8.79e-07	0.0242	2.98e-08	-0.0479	8 (4R/4S) [total: 19]	Purifying selection
b00582	Chr3B	491.5–567.5	6	DON	0.453	0.271	-0.182	0.0002	0.0078	2.27e-05	-0.0365	11 (11R/0S) [total: 47]	Purifying selection
b00876	Chr4D	512.3	1	VSK	0.768	0.634	-0.135	0.0013	0.0578	8.39e-06	-0.0443	3 (1R/2S) [total: 3]	Purifying selection
b01438	Chr7A	643.5–644.6	2	DON	0.716	0.609	-0.107	0.0107	0.0162	0.0059	-0.0248	5 (1R/4S) [total: 6]	Purifying selection
b00698	Chr4A	590.1–592.2	4	DON	0.495	0.394	-0.1	0.0222	0.0082	0.0314	-0.0179	9 (9R/0S) [total: 12]	Purifying selection
b01334	Chr6B	717.5–719.0	3	DON	0.653	0.482	-0.17	0.028	0.0115	0.0154	-0.0202	10 (8R/2S) [total: 17]	Purifying selection
b00089	Chr1A	592.9–593.5	2	DIS	0.589	0.715	0.125	0.0537	0.0334	0.1016	0.0143	5 (1R/4S) [total: 7]	Neutral
b01139	Chr5D	44.8–47.4	3	VSK	0.411	0.518	0.107	0.0624	0.0433	0.0391	0.0171	8 (4R/4S) [total: 17]	Neutral
b01307	Chr6B	676.6–682.8	4	DIS	0.495	0.609	0.114	0.0628	0.0259	0.0144	0.0203	10 (2R/8S) [total: 25]	Neutral
b01207	Chr6A	68.4–74.3	3	VSK	0.611	0.535	-0.075	0.0884	0.043	0.0322	-0.0182	4 (1R/3S) [total: 14]	Neutral
b01016	Chr5B	46.5–49.8	3	DIS	0.337	0.282	-0.055	0.0955	0.0136	0.1909	-0.0114	4 (4R/0S) [total: 12]	Neutral
b01293	Chr6B	265.1–399.1	3	DON	0.463	0.56	0.097	0.1055	0.0075	0.0387	0.0171	5 (2R/3S) [total: 8]	Neutral
b00573	Chr3B	52.4–53.9	4	DON	0.579	0.489	-0.09	0.2078	0.0307	0.2876	-0.0088	9 (4R/5S) [total: 19]	Neutral
b00872	Chr4D	455.5–456.7	3	VSK	0.663	0.743	0.08	0.2594	0.032	0.1726	0.0125	5 (1R/4S) [total: 11]	Neutral
b01202	Chr6A	35.6–37.8	5	VSK	0.463	0.553	0.09	0.2789	0.0096	0.735	0.0028	8 (1R/7S) [total: 29]	Neutral
b00455	Chr3A	11.9–12.4	5	DON	0.179	0.176	-0.003	0.3458	0.0216	0.3741	-0.009	5 (5R/0S) [total: 17]	Neutral
b01054	Chr5B	548.9–549.6	5	DIS	0.758	0.761	0.003	0.5457	0.0485	0.7968	-0.0025	2 (1R/1S) [total: 14]	Neutral
b00512	Chr3A	686.7–686.9	4	VSK	0.621	0.634	0.013	0.6363	0.0098	0.8509	0.0016	10 (1R/9S) [total: 20]	Neutral
b00039	Chr1A	344.9–358.6	2	DON	0.589	0.62	0.03	0.6409	0.0363	0.7352	-0.0029	5 (1R/4S) [total: 8]	Neutral
b00903	Chr5A	50.3–106.9	3	DON	0.179	0.208	0.029	0.7769	0.0405	0.8936	-0.0013	6 (6R/0S) [total: 9]	Neutral
b00036	Chr1A	44.0–51.8	5	VSK	0.663	0.697	0.034	0.9139	0.0698	0.8282	-0.0019	8 (1R/7S) [total: 22]	Neutral
b01047	Chr5B	539.6–539.8	2	DIS	0.463	0.496	0.033	0.9702	0.0167	0.5779	0.0046	7 (4R/3S) [total: 9]	Neutral
b01170	Chr5D	547.3–550.9	8	VSK	0.495	0.507	0.012	0.9851	0.0129	0.4674	-0.006	8 (4R/4S) [total: 44]	Neutral
ᵃ Haps (R/S) reports the number of dominant haplotype classes carried by ≥ 5 lines at each block, with the number classified as resistant (R) and susceptible (S). The bracketed value [total: n] gives the full count of observed haplotype classes including rare variants and heterozygous combinations. Haplotype classes are unique dosage strings across block markers; R/S labels are assigned to each c…
