# Supplementary material
Source: Research Square preprint supplement (doi:10.21203/rs.3.rs-10072722/v1)
Supplement: Supplementary file 2 [file 8a2f53187ad687f1c75014cf.docx]

SUPPLEMENTARY FIGURES


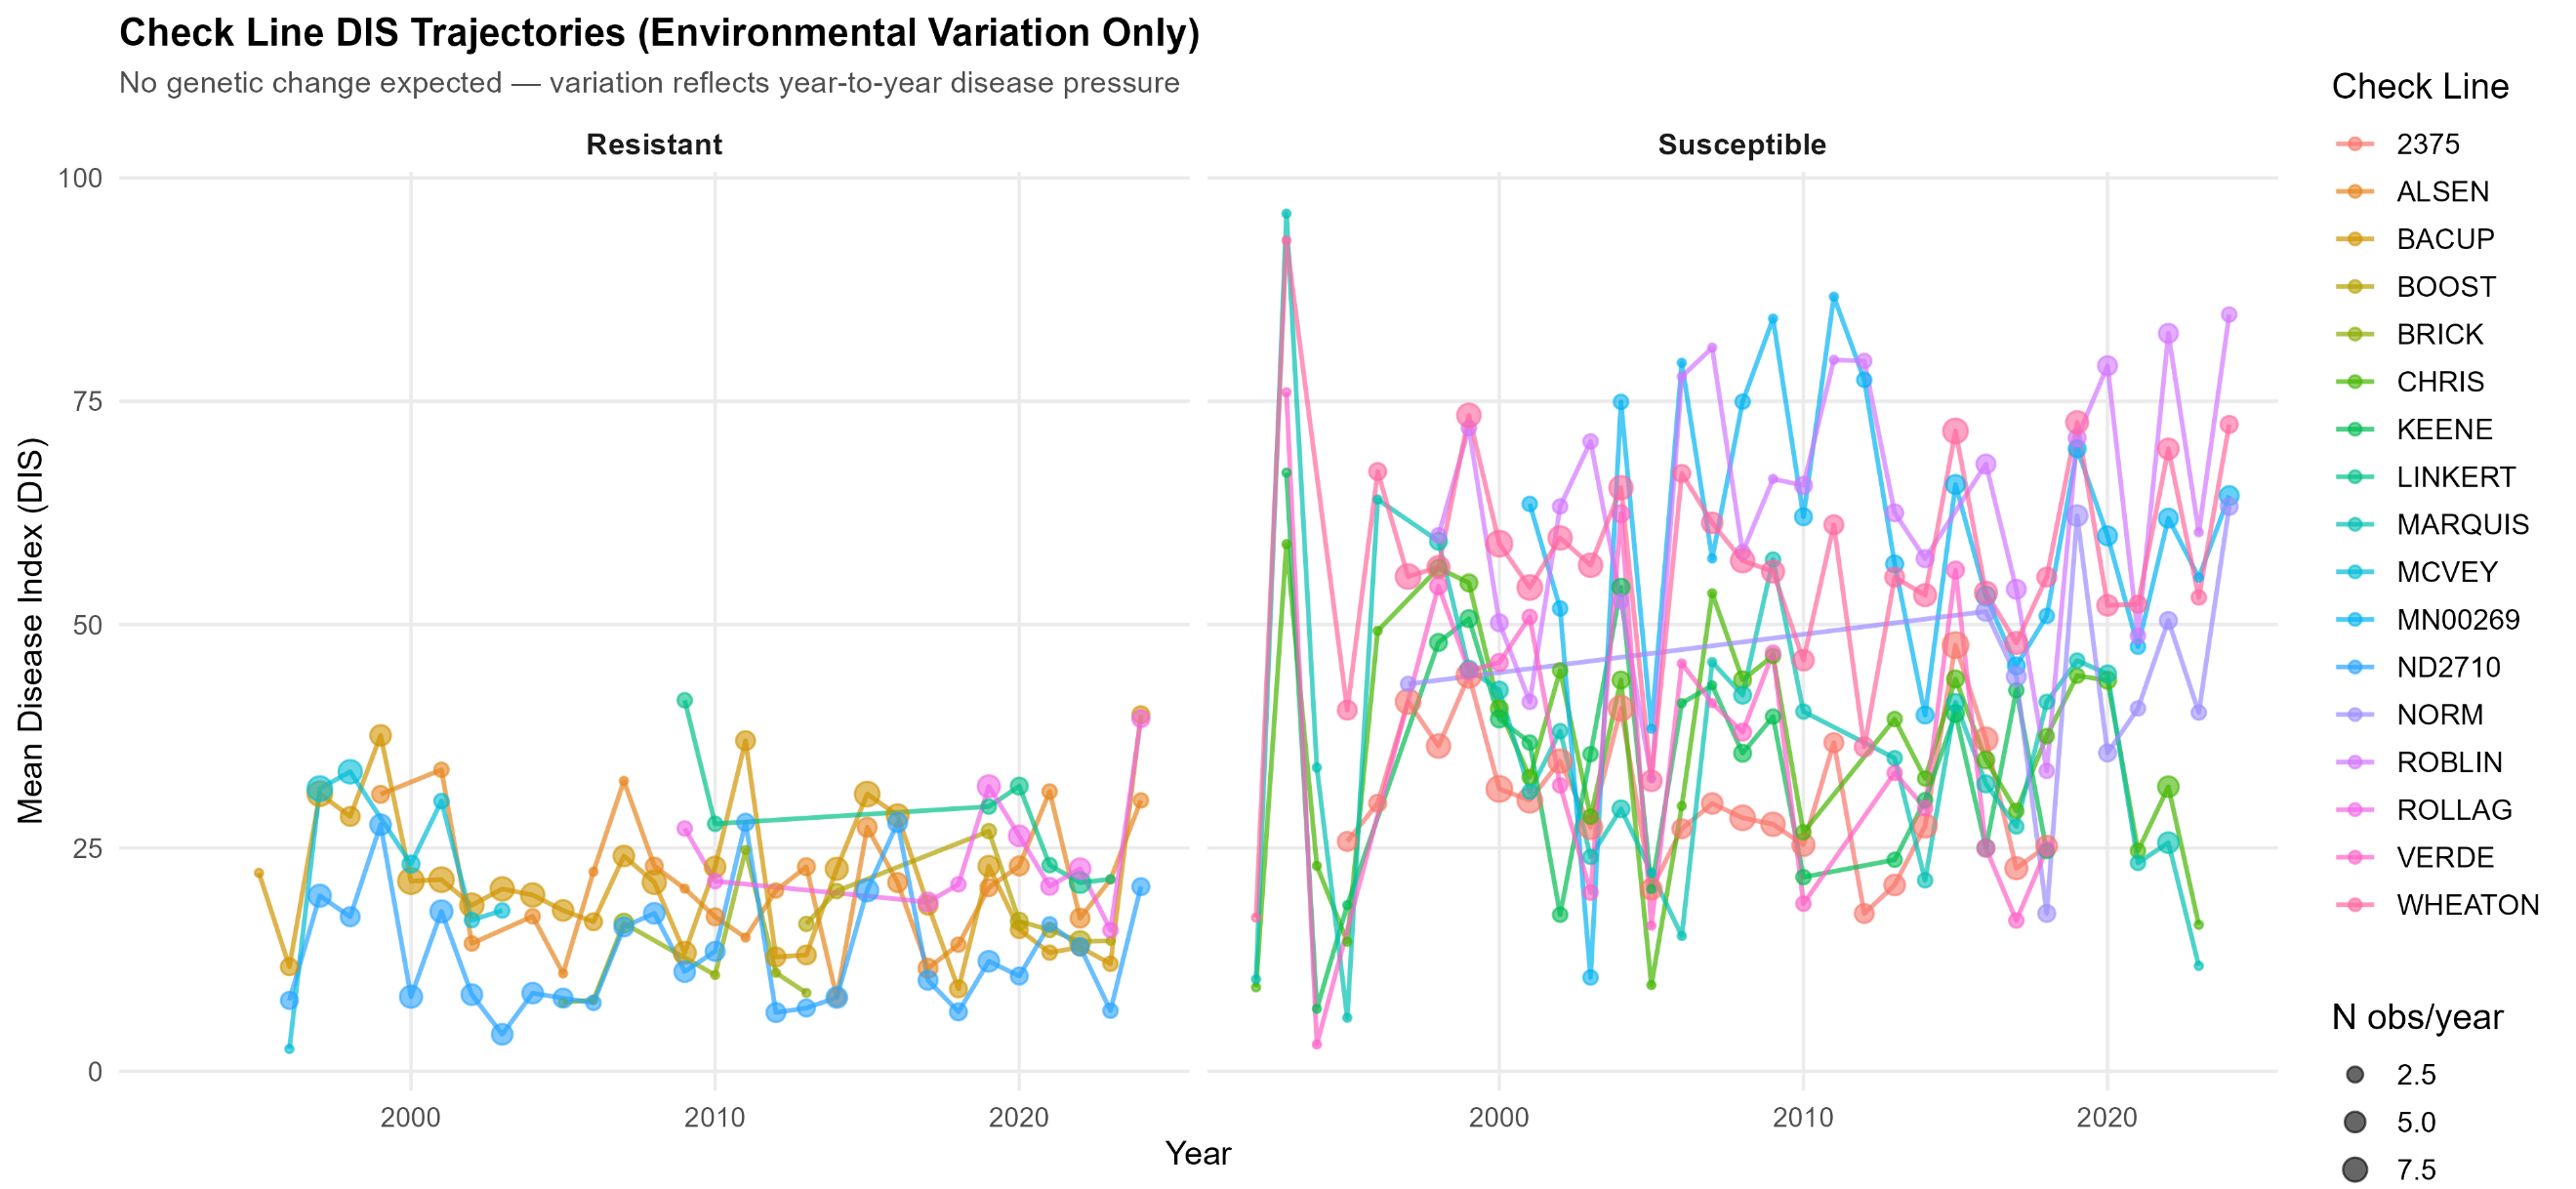


**Figure S2.** Check line DIS trajectories over 32 years. Absence of trend confirms environmental, not genetic, variation.


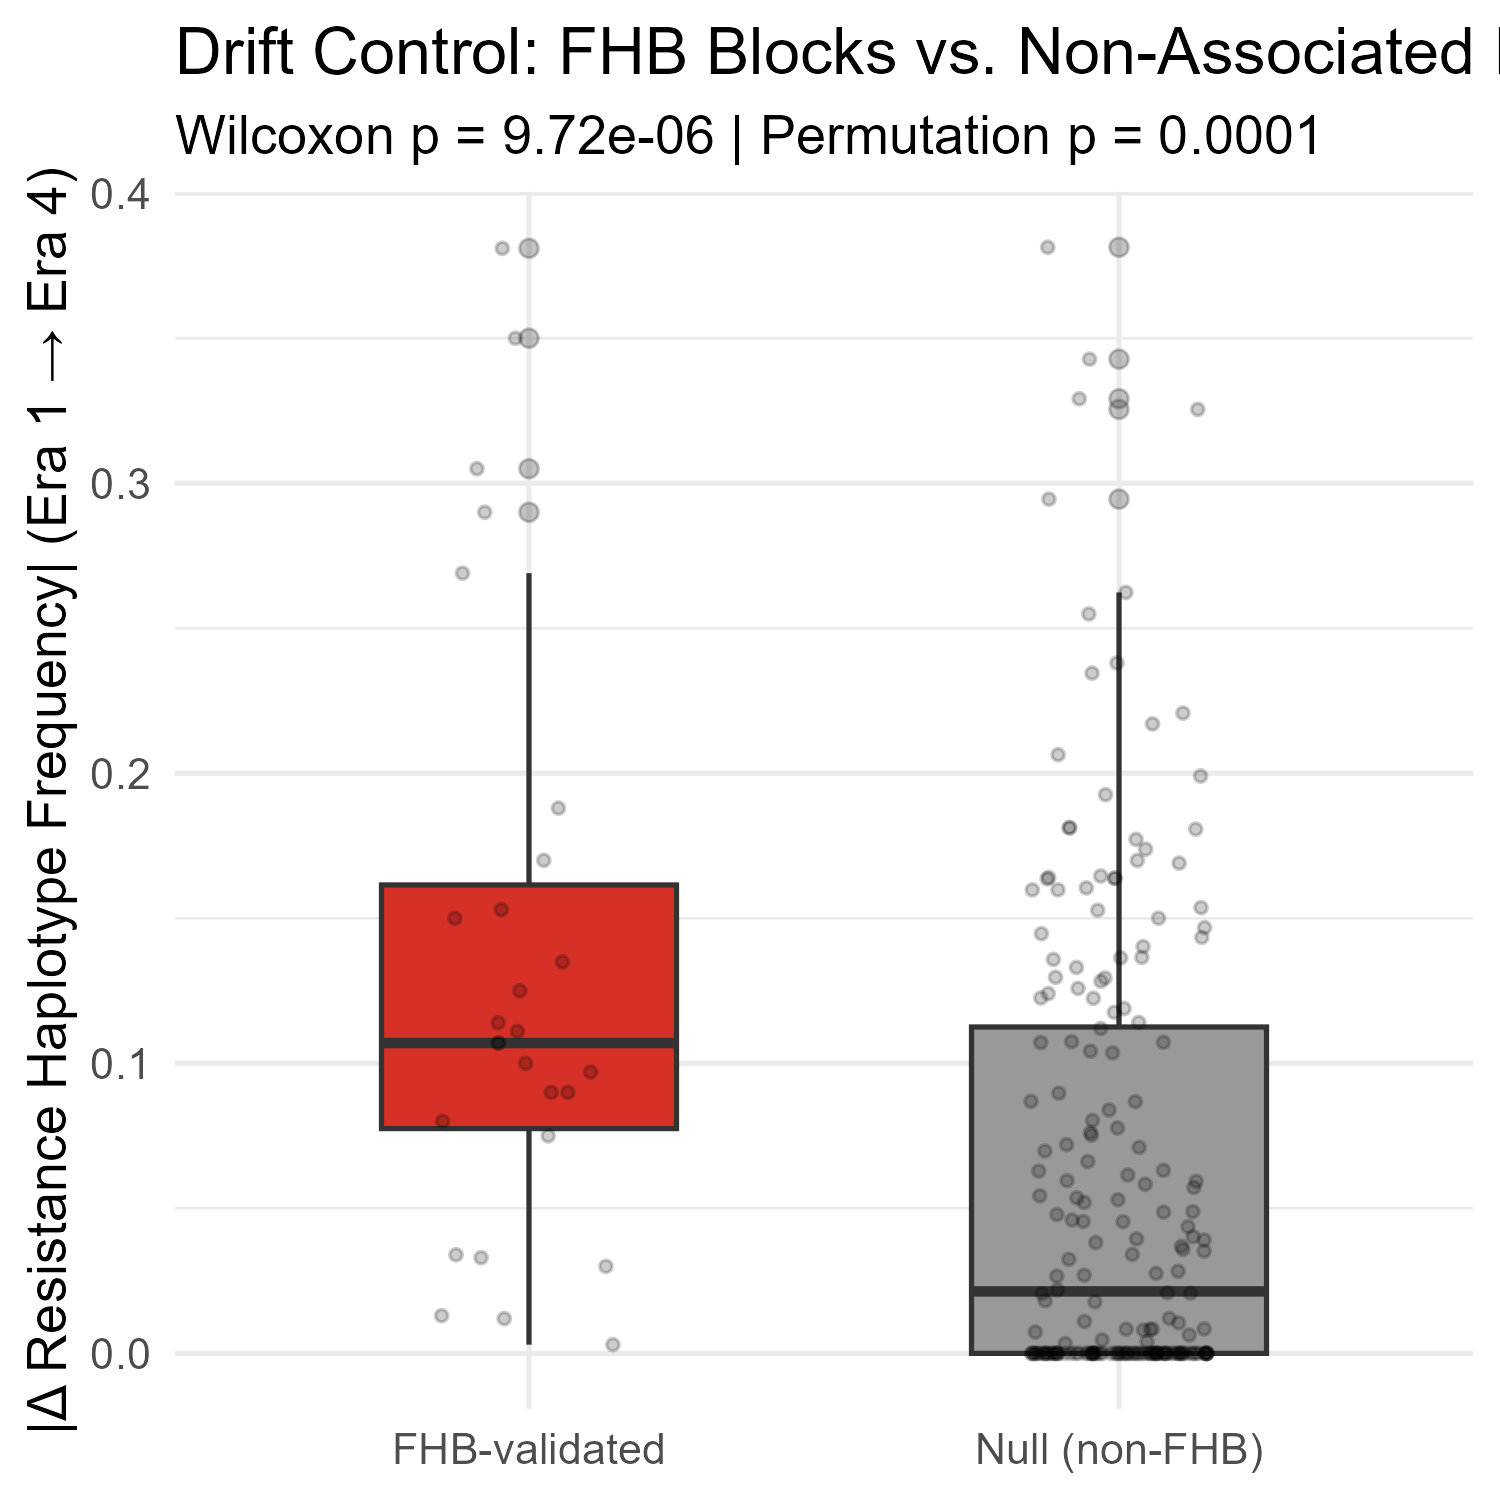


**Figure S4.** Drift control: |Δfreq| at FHB-validated blocks vs. non-associated blocks.
